# Supplementary material for: In Vitro Evaluation of the Potential Pharmacological Activity and Molecular Targets of New Benzimidazole-Based Schiff Base Metal Complexes
Source: MDPI journal article supplement (doi:10.3390/antibiotics10060728), 2021-06-16
Supplement: s1 [file s1]

## Supporting Materials for:

### *In vitro* Evaluation of the Potential Pharmacological Activity and Molecular Targets of New Benzimidazole-Based Schiff Base Metal Complexes

Alberto Aragón-Muriel <sup>1</sup>, Yamil Liscano <sup>2</sup>, Yulieth Upegui <sup>3</sup>, Sara M. Robledo <sup>3</sup>, María Teresa Ramírez-Apan <sup>4</sup>, David Morales-Morales <sup>4</sup>, Jose Oñate-Garzón <sup>2</sup> and Dorian Polo-Cerón <sup>1,\*</sup>

<sup>1</sup> Laboratorio de Investigación en Catálisis y Procesos (LICAP), Departamento de Química, Facultad de Ciencias Naturales y Exactas, Universidad del Valle, 760001 Cali, Colombia; alberto.aragon@correounivalle.edu.co (A.A.-M.); dorian.polo@correounivalle.edu.co (D.P.-C.)

<sup>2</sup> Grupo de Investigación en Química y Biotecnología (QUIBIO), Facultad de Ciencias Básicas, Universidad Santiago de Cali, 760031 Cali, Colombia; yamil.liscano00@usc.edu.co (Y.L.); jose.onate00@usc.edu.co (J.O.-G.)

<sup>3</sup> PECET, Facultad de Medicina, Universidad de Antioquia, 050010 Medellín, Colombia; yulieth.uegui@udea.edu.co (Y.U.); sara.robledo@udea.edu.co (S.M.R.)

<sup>4</sup> Instituto de Química, Universidad Nacional Autónoma de México, Cd. Universitaria, Circuito Exterior, Coyoacán, 04510 México D.F., México; damor@unam.mx (D.M.-M.); mtrapan@yahoo.com.mx (M.R.-A.)

\* Correspondence: dorian.polo@correounivalle.edu.co

#### 1. FT-IR spectral data

**Table S1.** Bands present in the IR spectra of Bz1, Bz2, Schiff bases ligands and their lanthanide complexes (values in cm<sup>-1</sup>)

| Compound | $\nu(\text{N-H}_2)$ | $\delta(\text{N-H}_2)$ | $\nu(\text{N=CH})$ | $\nu(\text{N=C})$ | $\nu(\text{C=C})$ | $\nu(\text{C-O})$ |
|----------|---------------------|------------------------|--------------------|-------------------|-------------------|-------------------|
| Bz1      | 3437, 3338          | 1619                   | -                  | 1566              | 1507              | -                 |
| L1       | -                   | -                      | 1602               | 1575              | 1509              | 1258              |
| La-L1    | -                   | -                      | 1622               | 1563              | 1506              | 1347              |
| Ce-L1    | -                   | -                      | 1624               | 1565              | 1507              | 1349              |
| L2       | -                   | -                      | 1605               | 1568              | 1495              | 1260              |
| La-L2    | -                   | -                      | 1624               | 1559              | 1493              | 1310              |
| Ce-L2    | -                   | -                      | 1619               | 1555              | 1492              | 1310              |
| Bz2      | 3401, 3328          | 1638                   | -                  | 1561              | 1492              | -                 |
| L3       | -                   | -                      | 1600               | 1570              | 1495              | 1277              |
| La-L3    | -                   | -                      | 1634               | 1562              | 1493              | 1308              |
| Ce-L3    | -                   | -                      | 1635               | 1562              | 1493              | 1310              |
| L4       | -                   | -                      | 1600               | 1566              | 1505              | 1277              |
| La-L4    | -                   | -                      | 1635               | 1560              | 1494              | 1313              |
| Ce-L4    | -                   | -                      | 1636               | 1559              | 1492              | 1313              |

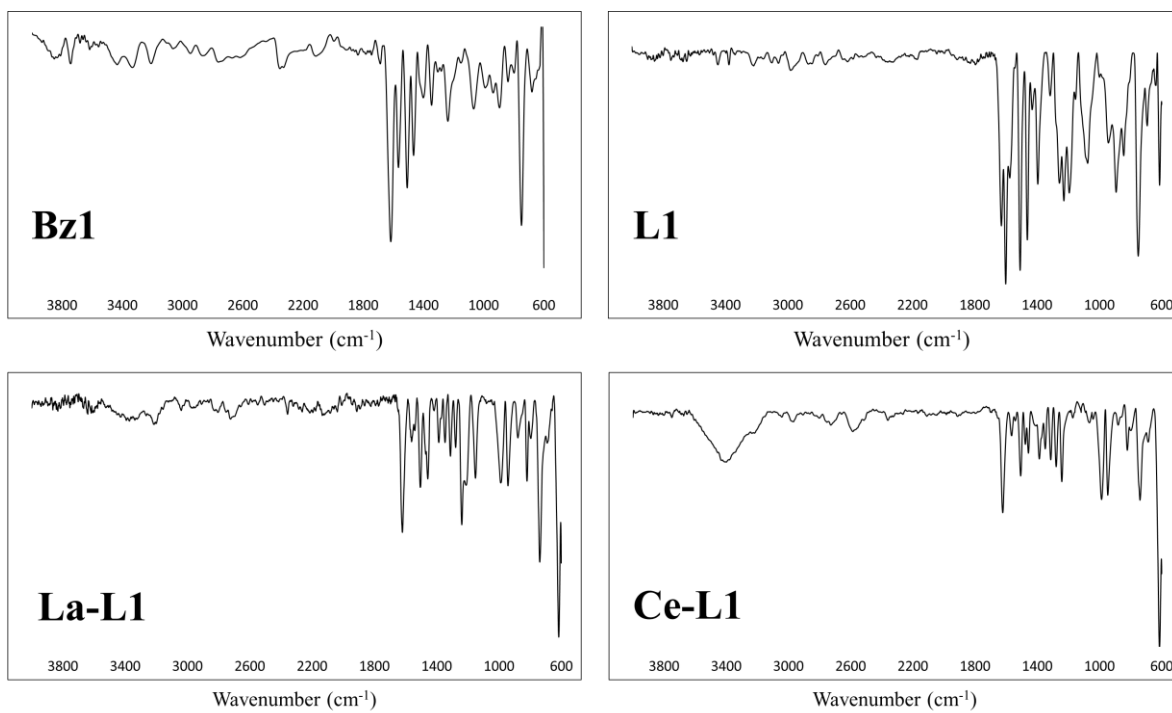

**Figure S1.** FT-IR spectra of *Bz1*, *L1*, *La-L1* and *Ce-L1*.

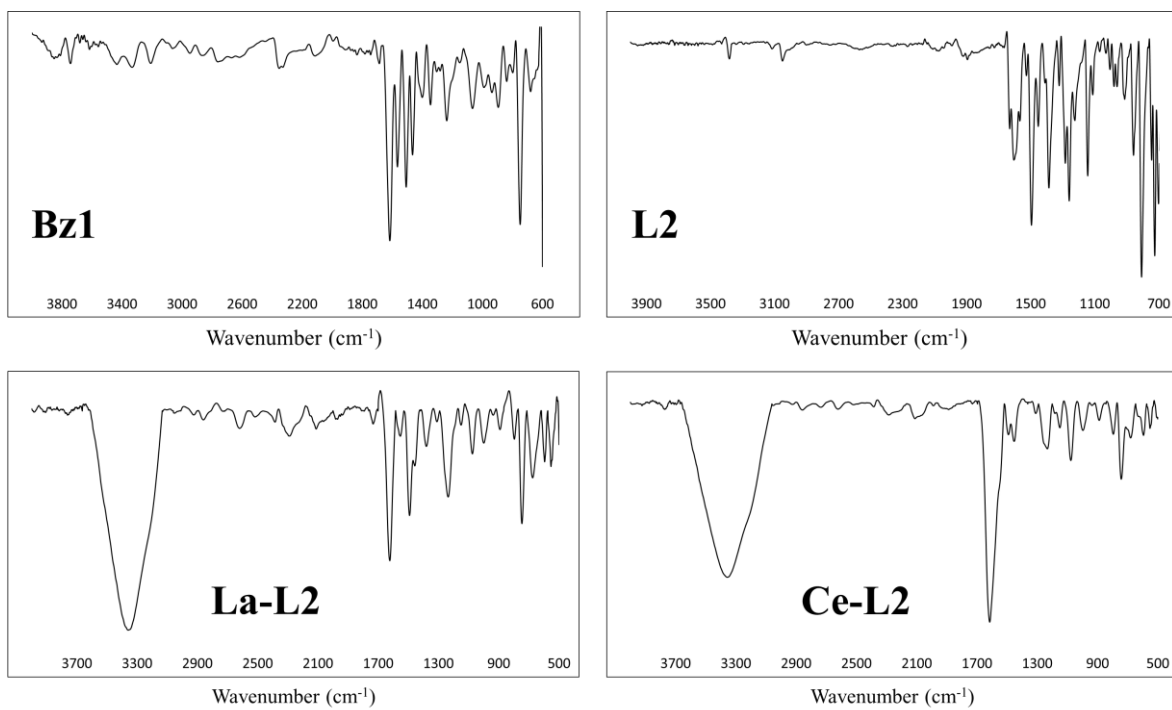

**Figure S2.** FT-IR spectra of *Bz1*, *L2*, *La-L2* and *Ce-L2*.

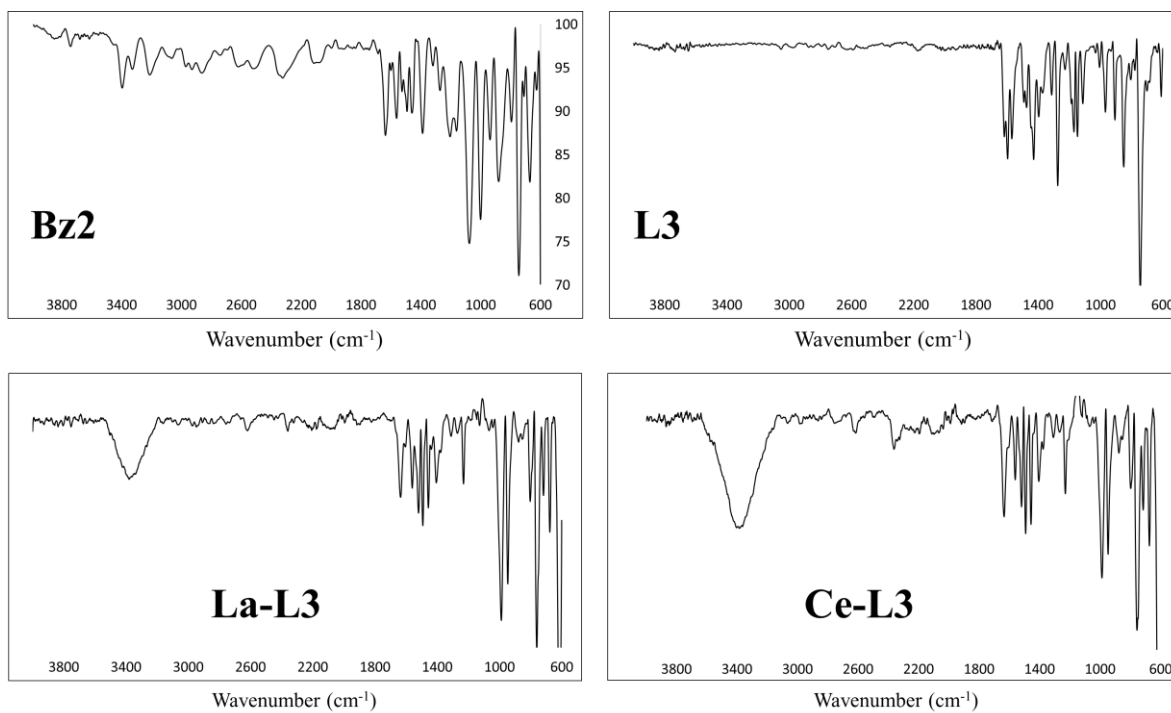

**Figure S3.** FT-IR spectra of *Bz2*, *L3*, *La-L3* and *Ce-L3*.

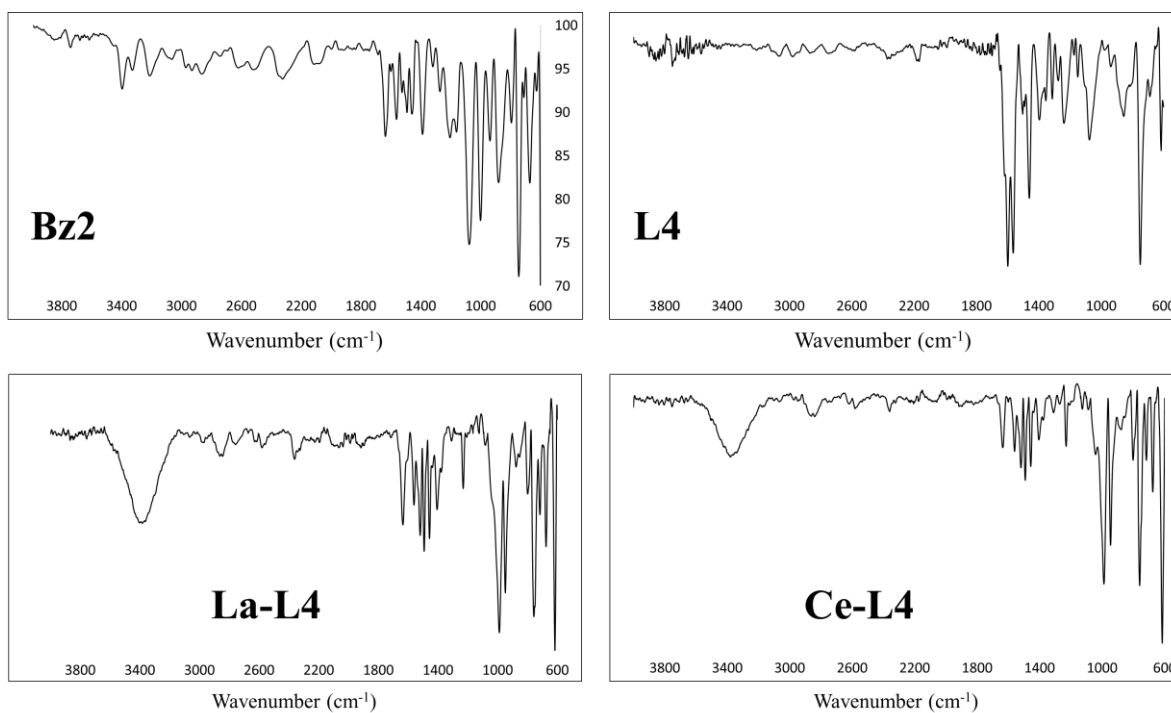

**Figure S4.** FT-IR spectra of *Bz2*, *L4*, *La-L4* and *Ce-L4*.

## 2. NMR spectral data

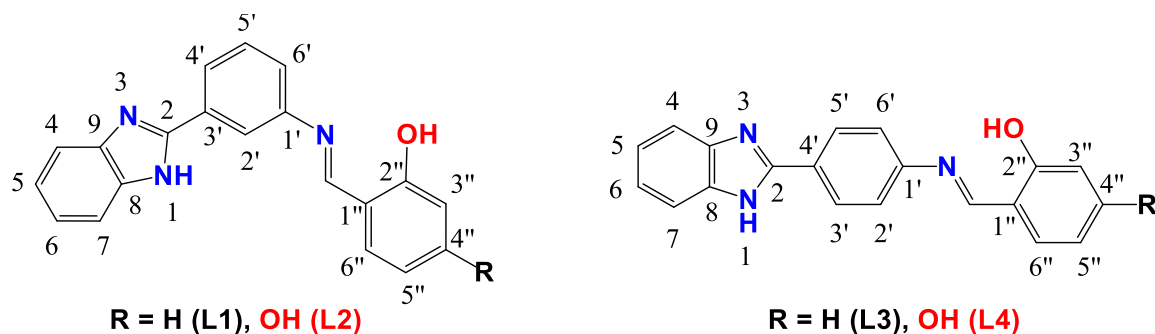

**Scheme S1.** Structure of Schiff bases ligands.

**Table S2.** NMR-<sup>1</sup>H spectral data of Schiff bases ligands and lanthanide complexes\*

| Compound | Benzimidazole ring |                      |                      |                      | Aminophenyl ring |                 |                 |                 |       | Salicylidene ring |                  |                  |                  |                  |
|----------|--------------------|----------------------|----------------------|----------------------|------------------|-----------------|-----------------|-----------------|-------|-------------------|------------------|------------------|------------------|------------------|
|          | NH                 | H <sub>4</sub>       | H <sub>7</sub>       | H <sub>5,6</sub>     | H <sub>2'</sub>  | H <sub>4'</sub> | H <sub>5'</sub> | H <sub>6'</sub> | N=CH  | OH                | H <sub>3''</sub> | H <sub>4''</sub> | H <sub>5''</sub> | H <sub>6''</sub> |
| L1       | 12.99s             | 7.56dd<br>(7.6, 2.2) | 7.73dd<br>(8.1, 1.8) | 7.23dt<br>(6.4, 3.5) | 8.20s            | 8.12d<br>(7.7)  | 7.65t<br>(7.8)  | 7.64d<br>(7.8)  | 9.10s | 12.99s            | 7.03d<br>(7.4)   | 7.46t<br>(7.8)   | 7.04t<br>(7.4)   | 7.64d<br>(7.8)   |
| La-L1    | 13.02s             | 7.56d<br>(7.7)       | 7.76d<br>(7.5)       | 7.23m                | 8.35s            | 8.20d<br>(7.5)  | 7.64t<br>(7.2)  | 7.63d<br>(7.2)  | 9.18s | -                 | 7.03d<br>(7.8)   | 7.46t<br>(7.9)   | 7.03d<br>(7.8)   | 7.63d<br>(7.2)   |
| L2       | 13.47s             | 7.56d<br>(7.7)       | 7.69d<br>(7.8)       | 7.23m                | 8.14s            | 8.08d<br>(7.7)  | 7.61t<br>(7.8)  | 7.49d<br>(7.9)  | 8.94s | 12.98s            | 6.35s            | 10.34s           | 6.45d<br>(8.5)   | 7.51d<br>(8.6)   |
| La-L2    | 13.48s             | 7.60d<br>(7.8)       | 7.63d<br>(7.6)       | 7.24m                | 8.26s            | 8.14d<br>(7.7)  | 7.64t<br>(7.6)  | 7.47d<br>(8.6)  | 9.01s | -                 | 6.42s            | 10.58s           | 6.49d<br>(8.5)   | 7.52d<br>(8.7)   |
| L3       | 13.00s             | 7.63d<br>(8.4)       | 7.71d<br>(7.7)       | 7.24dt<br>(6.2, 3.5) | 7.63d<br>(8.4)   | 8.29d<br>(8.4)  |                 |                 | 9.09s | 13.00s            | 7.01d<br>(7.7)   | 7.46t<br>(7.8)   | 7.02t<br>(7.7)   | 7.63d<br>(8.4)   |
| La-L3    | 12.97s             | 7.61d<br>(8.3)       | 7.72d<br>(7.6)       | 7.22dd<br>(5.8, 3.0) | 7.61d<br>(8.3)   | 8.35d<br>(8.3)  |                 |                 | 9.09s | -                 | 7.02d<br>(6.4)   | 7.45t<br>(7.7)   | 7.02t<br>(6.4)   | 7.61d<br>(8.3)   |
| L4       | 13.45s             | 7.53d<br>(7.4)       | 7.66d<br>(7.2)       | 7.21t<br>(9.2)       | 7.54d<br>(8.6)   | 8.24d<br>(8.6)  |                 |                 | 8.92s | 12.91s            | 6.32s            | 10.33s           | 6.43d<br>(8.5)   | 7.47d<br>(8.5)   |
| La-L4    | 13.46s             | 7.61m                | 7.61m                | 7.21dd<br>(5.9, 3.0) | 7.54d<br>(8.3)   | 8.31d<br>(8.4)  |                 |                 | 8.93s | -                 | 6.40s            | 10.60s           | 6.48d<br>(8.5)   | 7.49d<br>(8.5)   |

\*Spectra have been recorded in DMSO-*d*<sub>6</sub>; δ in ppm and coupling constant in Hz are given in parentheses.

AAM-4.2.fid —

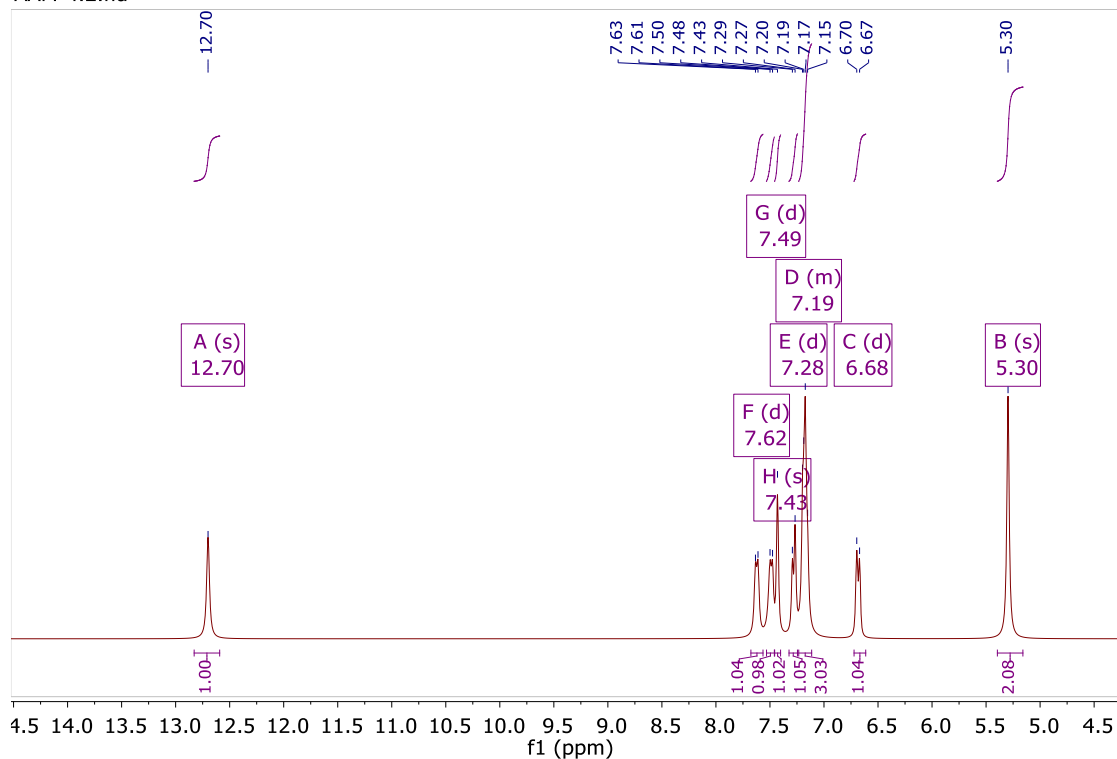

**Figure S5.** NMR-<sup>1</sup>H spectra of *BzI*

A4.1.fid —

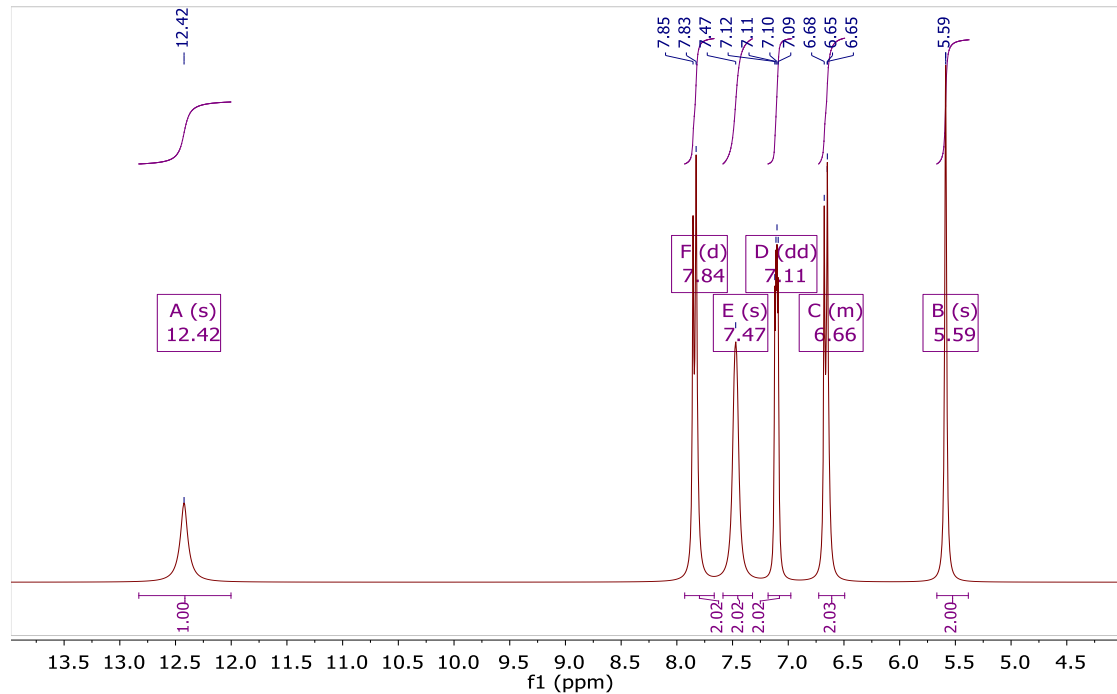

**Figure S6.** NMR-<sup>1</sup>H spectra of *Bz2*

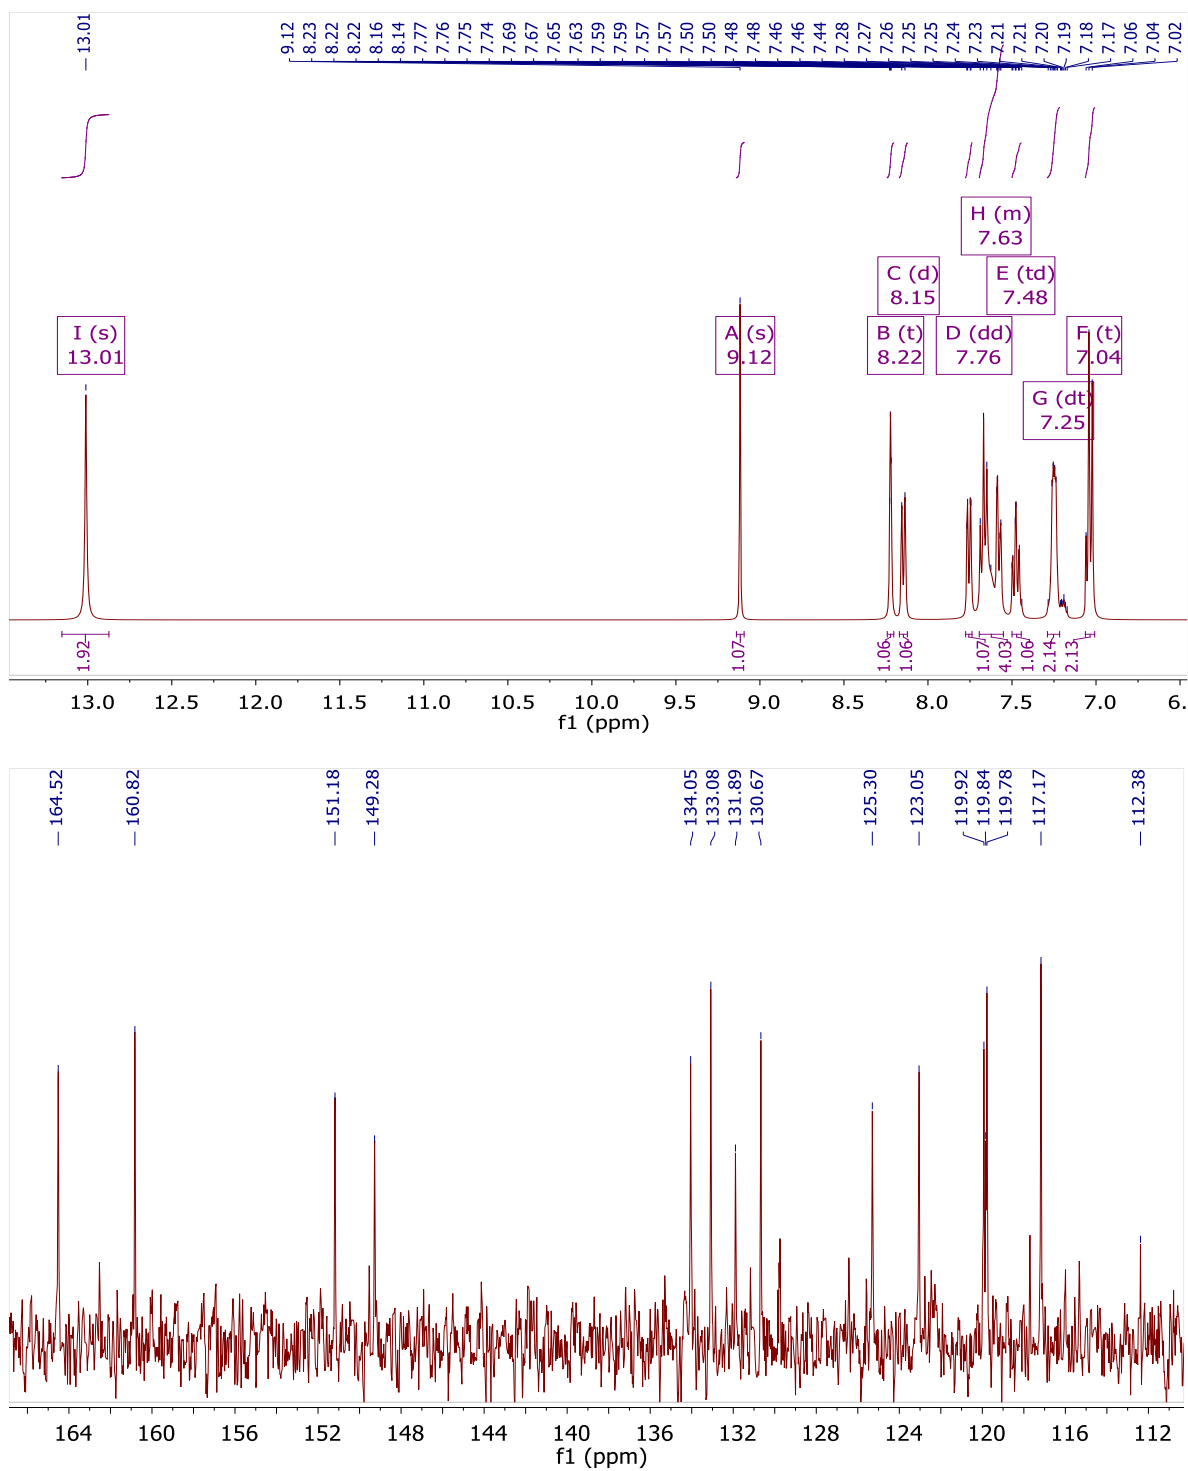

**Figure S7.** NMR-<sup>1</sup>H and <sup>13</sup>C{<sup>1</sup>H} spectra of *LI*

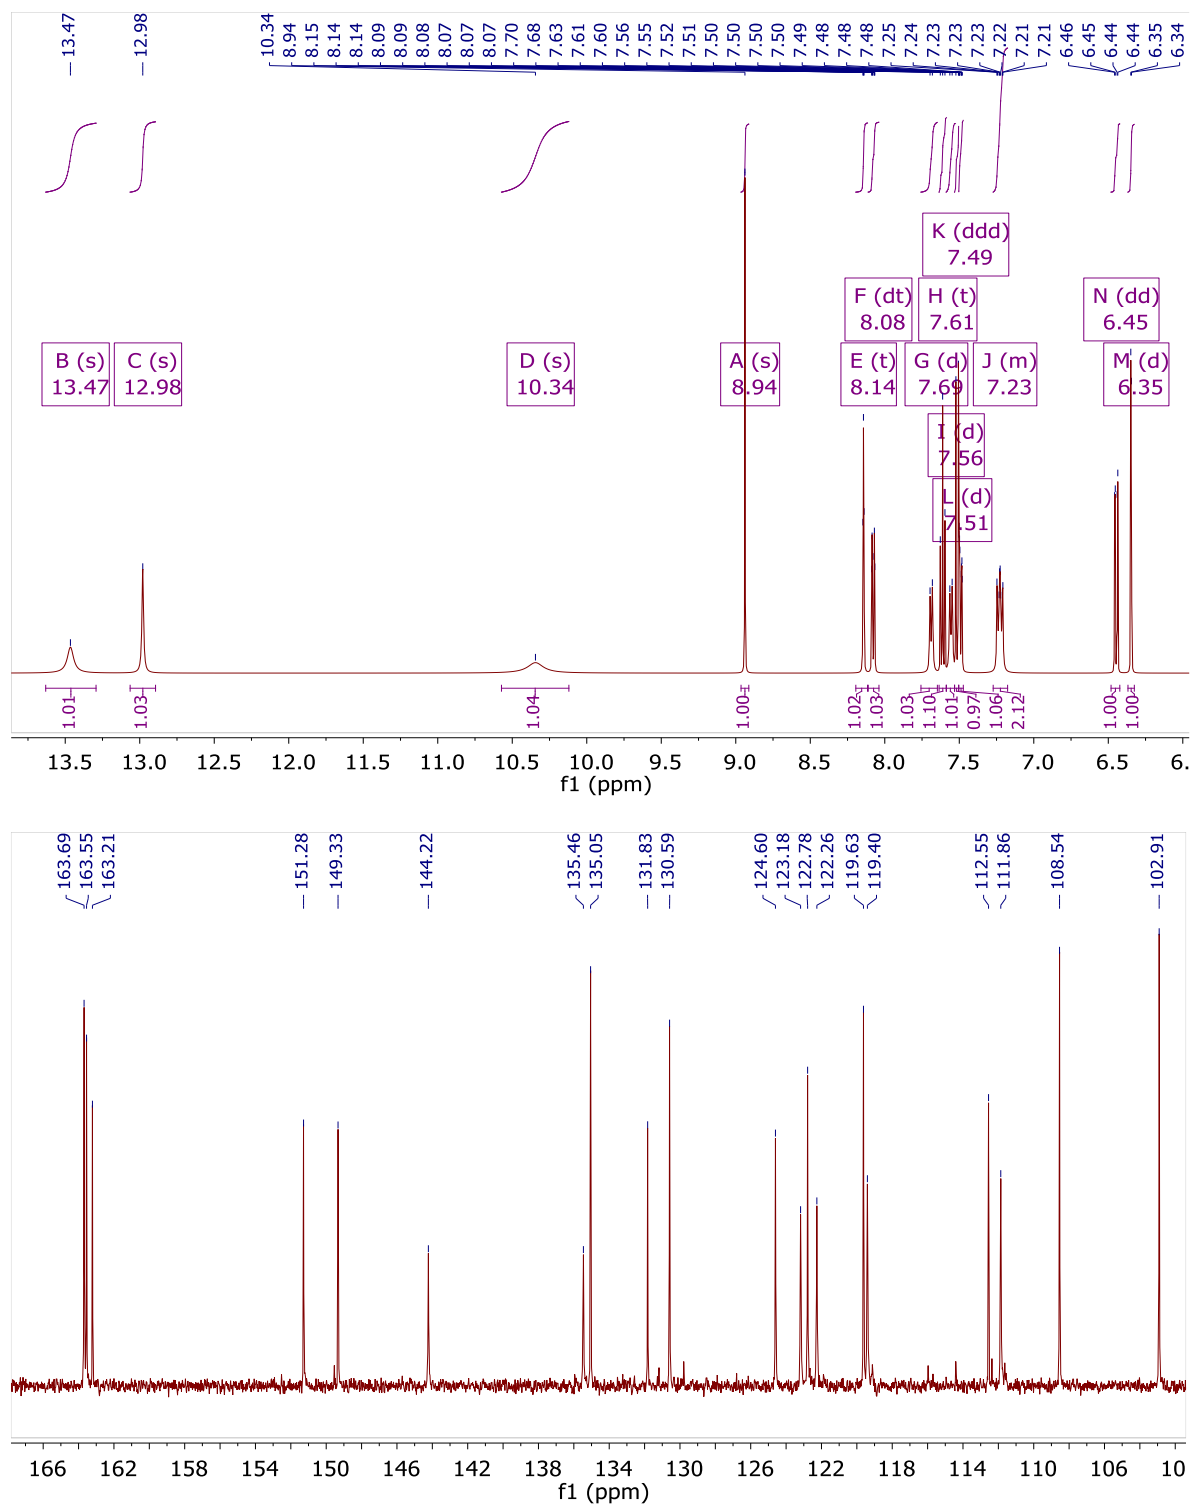

**Figure S8.** NMR-<sup>1</sup>H and <sup>13</sup>C{<sup>1</sup>H} spectra of *L2*

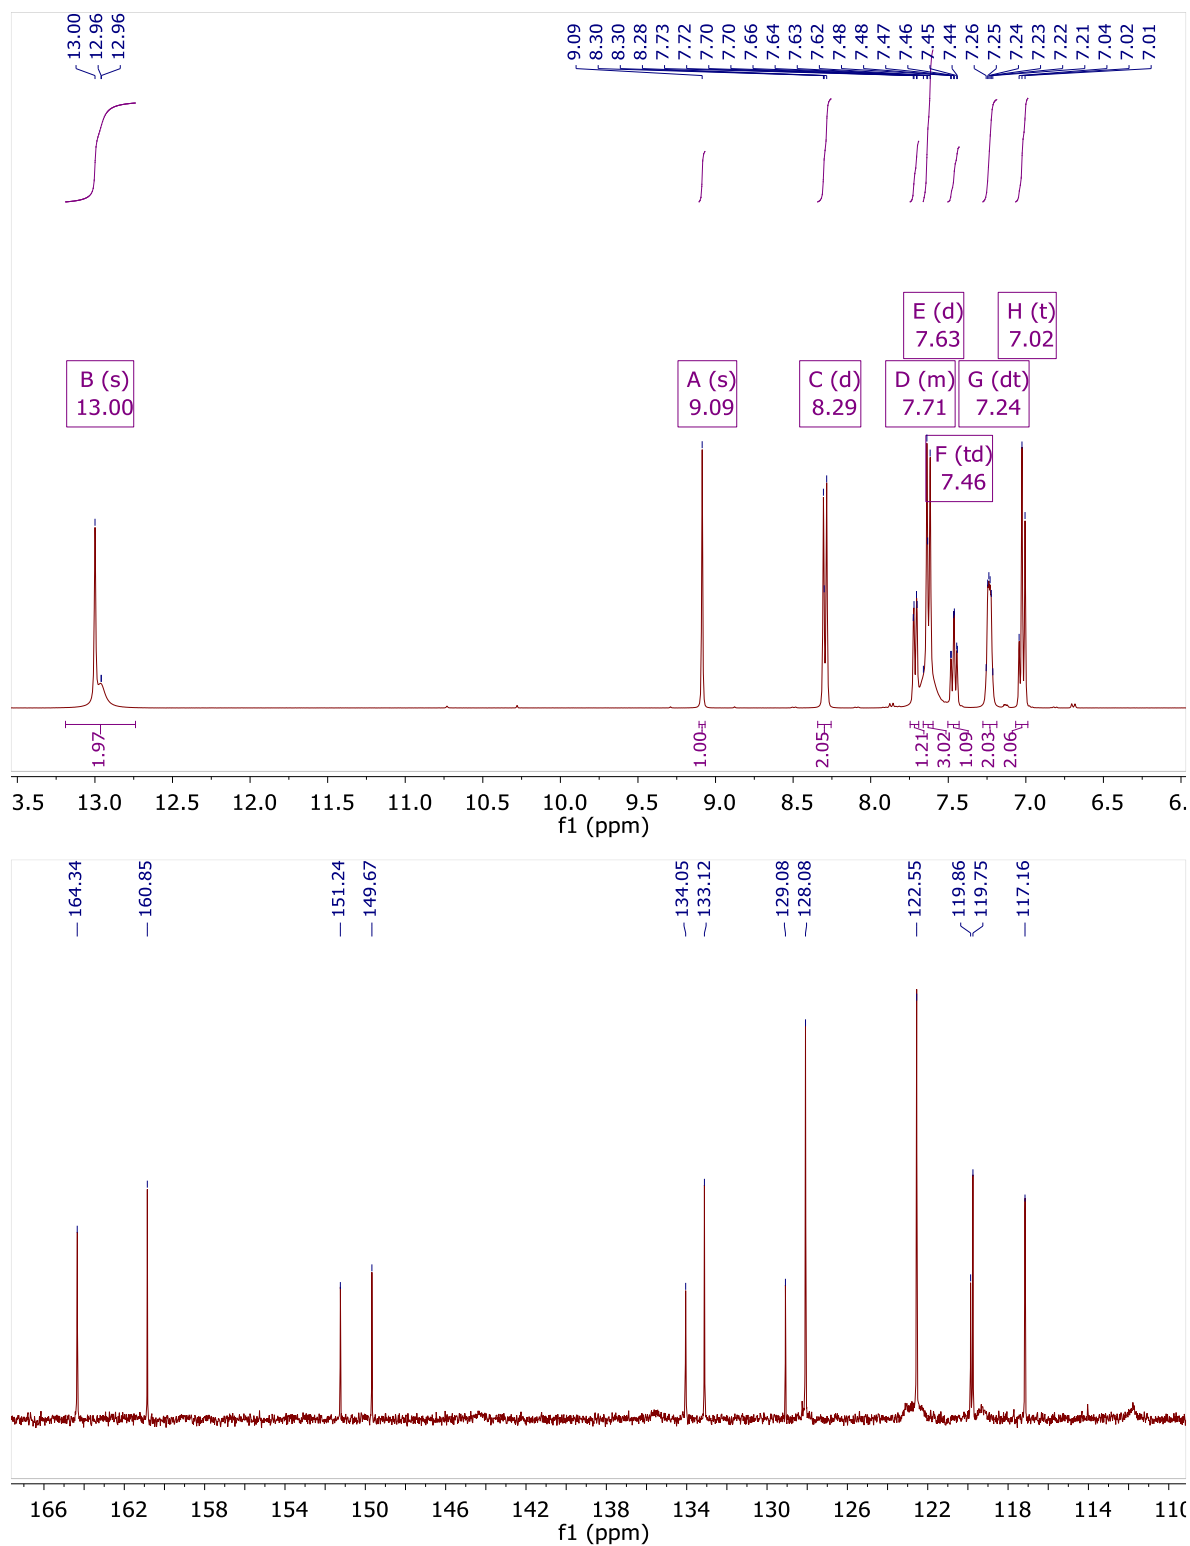

**Figure S9.** NMR- $^1\text{H}$  and  $^{13}\text{C}\{^1\text{H}\}$  spectra of *L3*



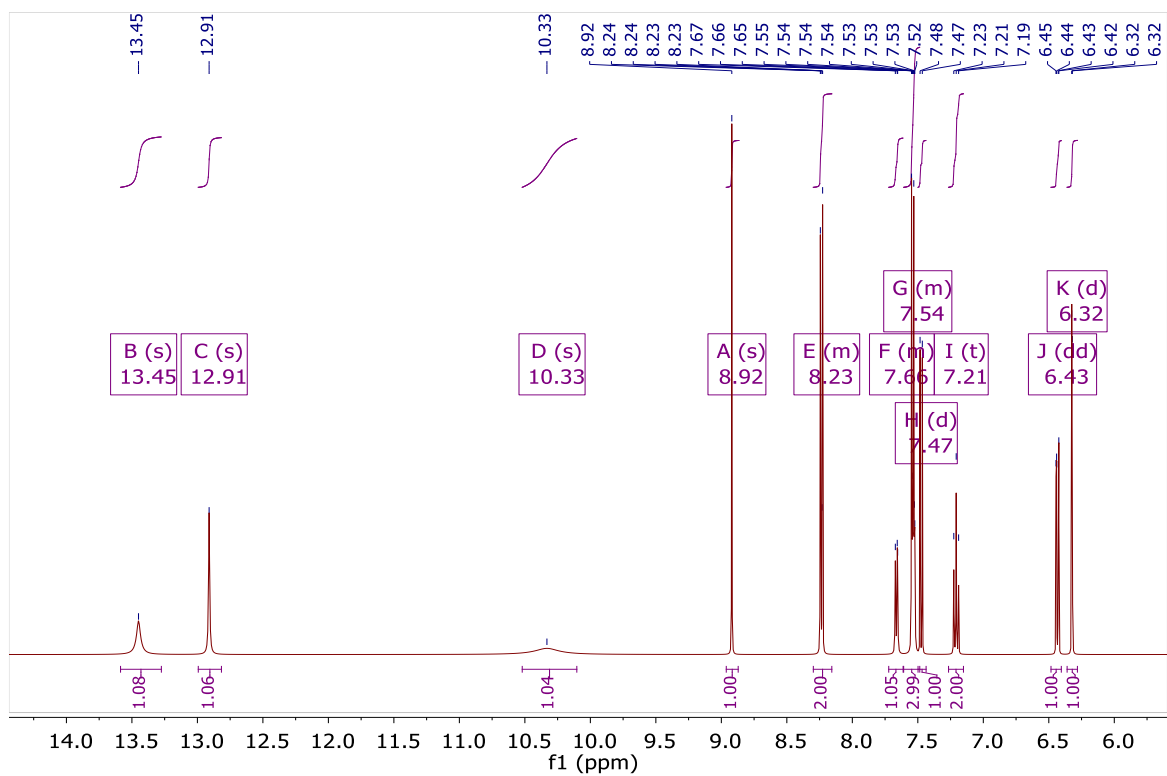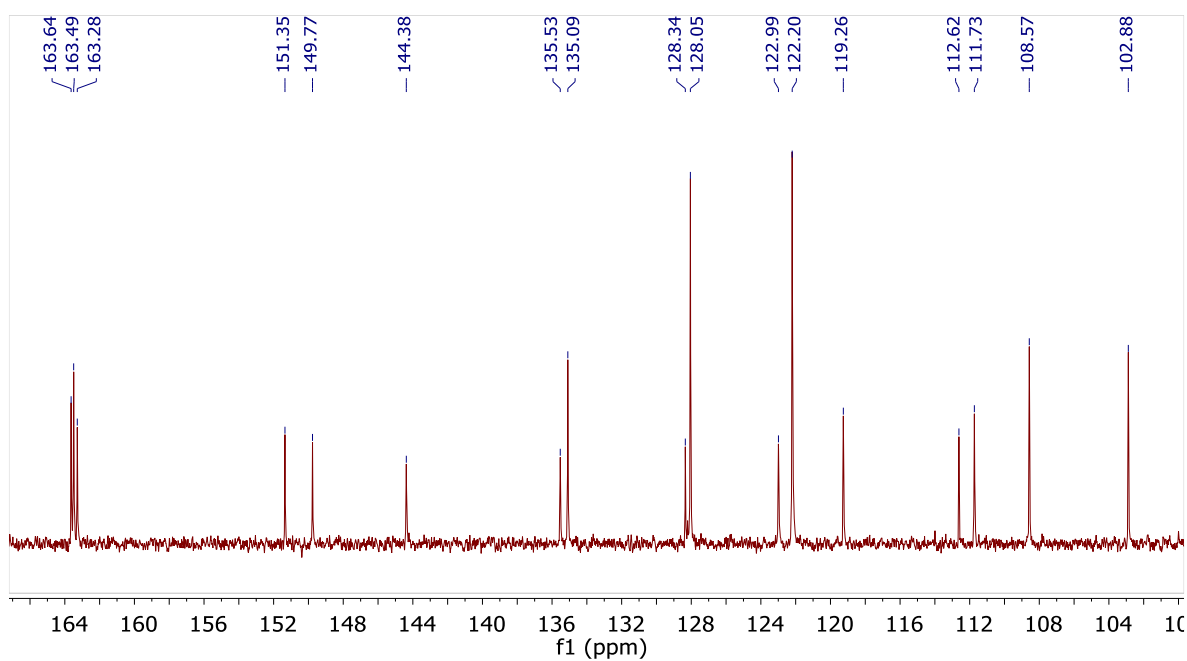

**Figure S10.** NMR-<sup>1</sup>H and <sup>13</sup>C{<sup>1</sup>H} spectra of *L4*

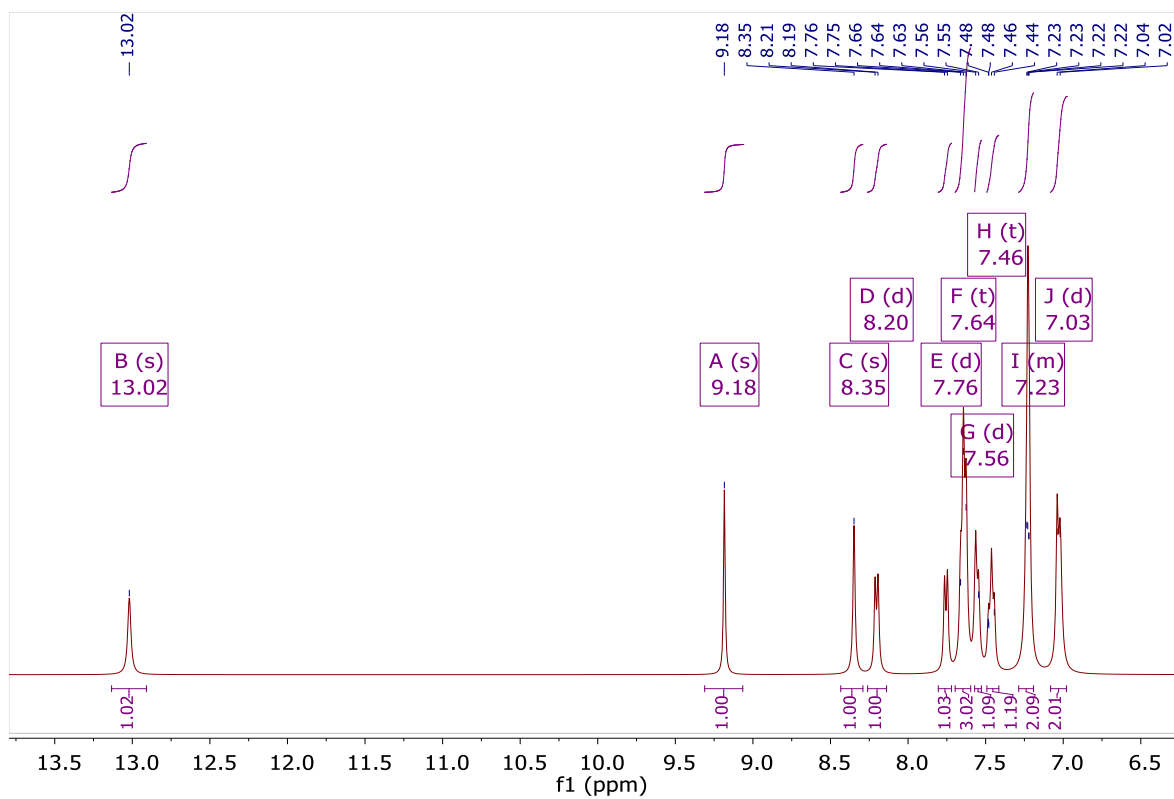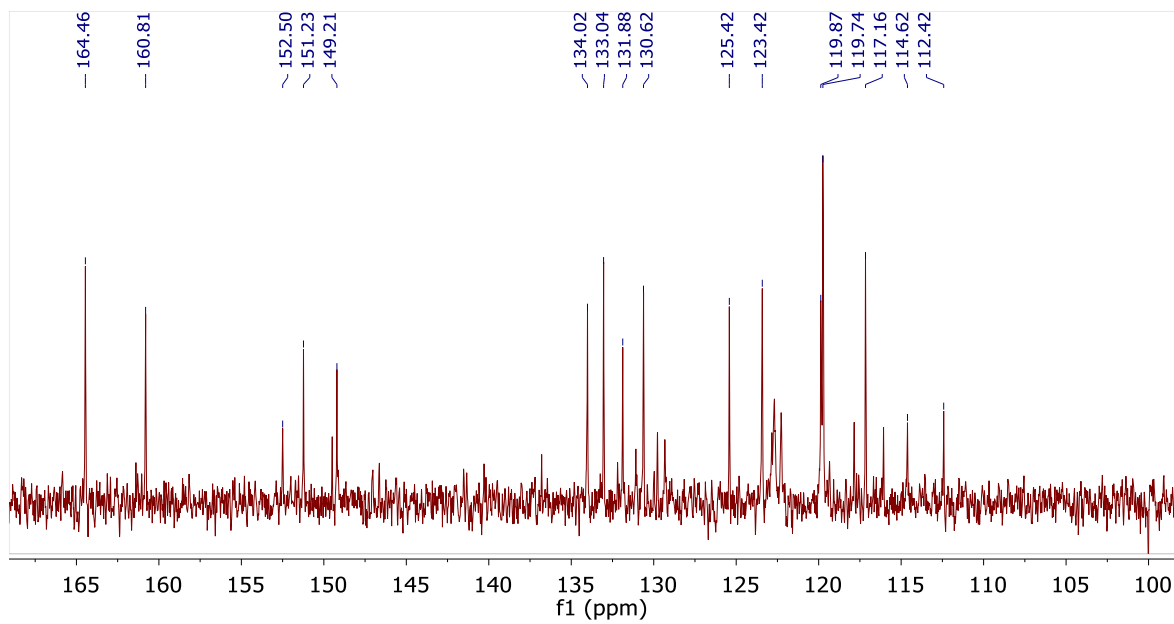

**Figure S11.** NMR-<sup>1</sup>H and <sup>13</sup>C{<sup>1</sup>H} spectra of *La-L1*

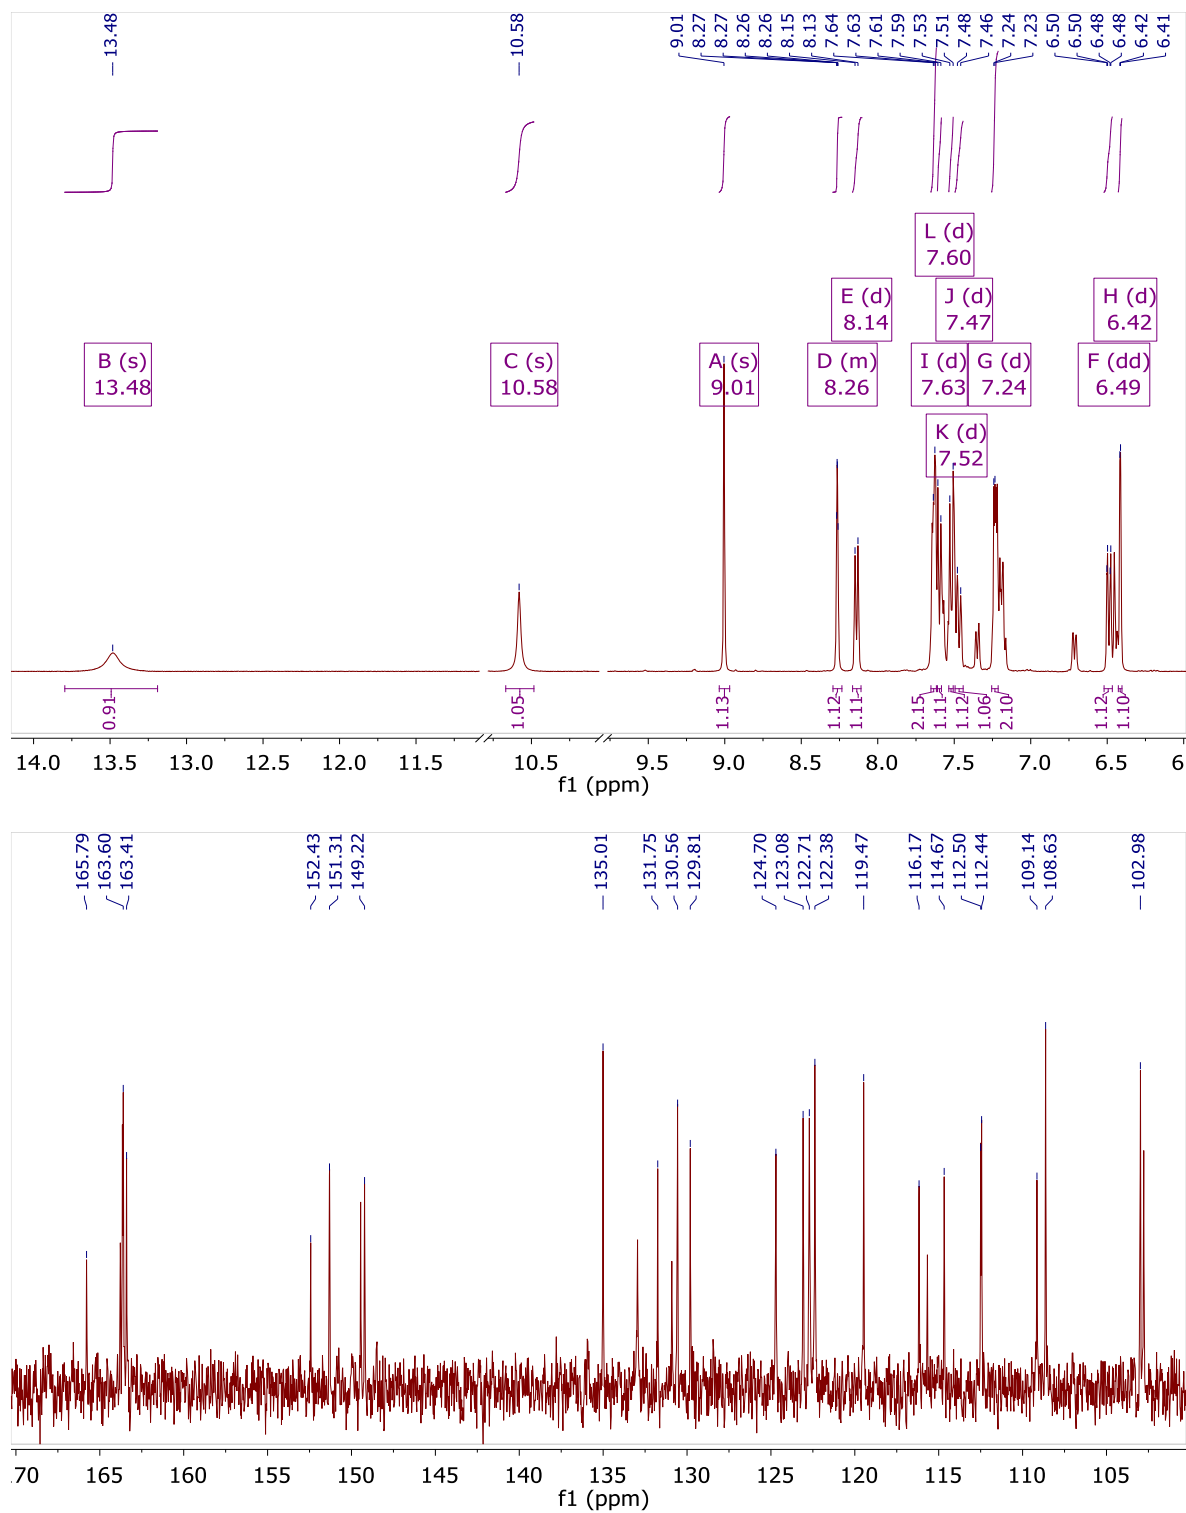

**Figure S12.** NMR- $^1\text{H}$  and  $^{13}\text{C}\{^1\text{H}\}$  spectra of *La-L2*

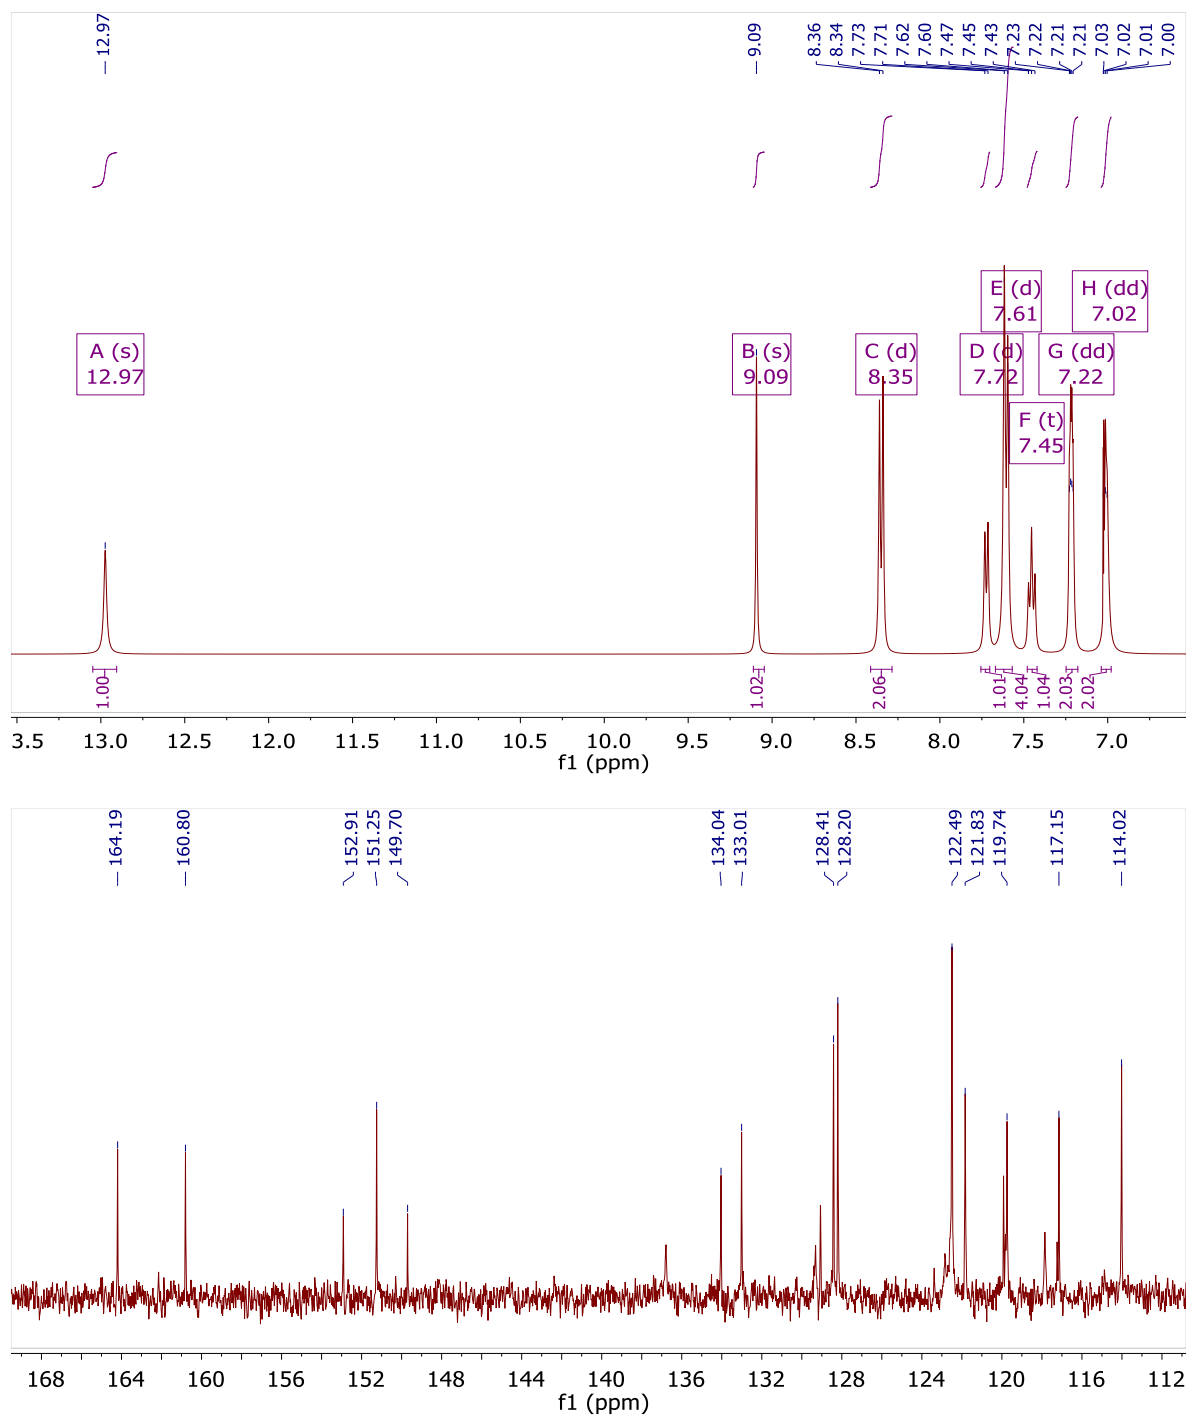

**Figure S13.** NMR- $^1\text{H}$  and  $^{13}\text{C}\{^1\text{H}\}$  spectra of *La-L3*

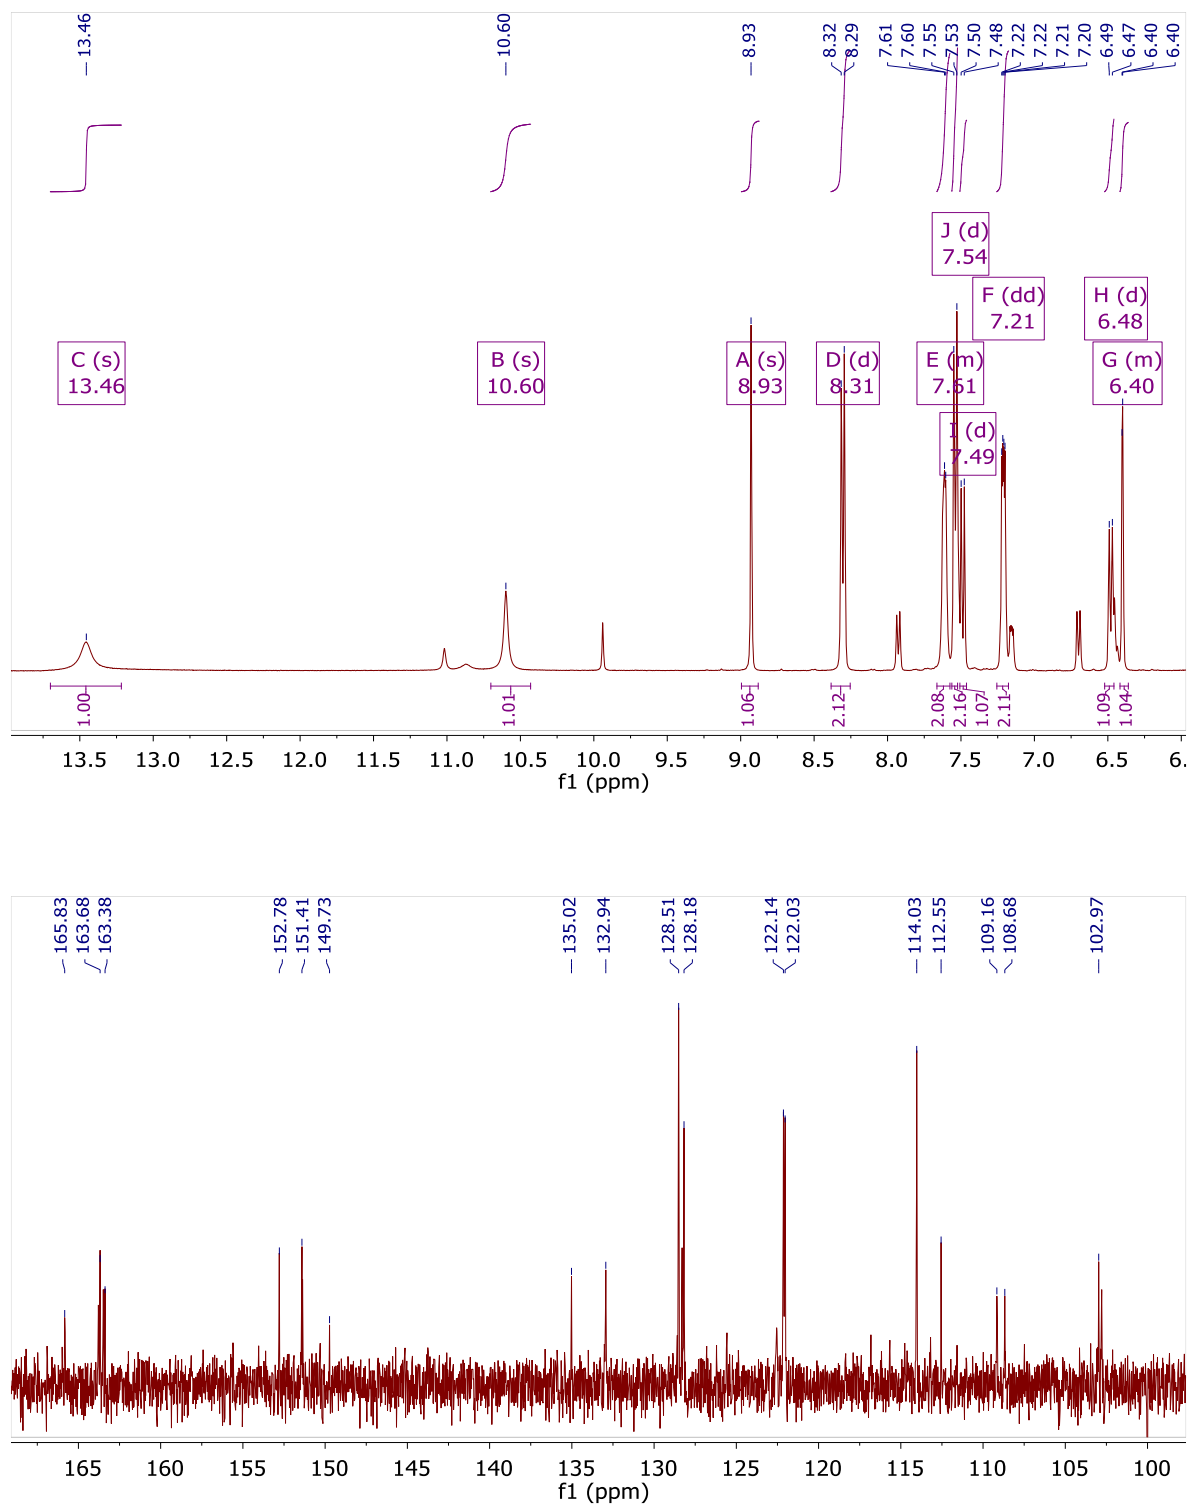

**Figure S14.** NMR- $^1\text{H}$  and  $^{13}\text{C}\{^1\text{H}\}$  spectra of *La-L4*

### 3. Mass spectral data

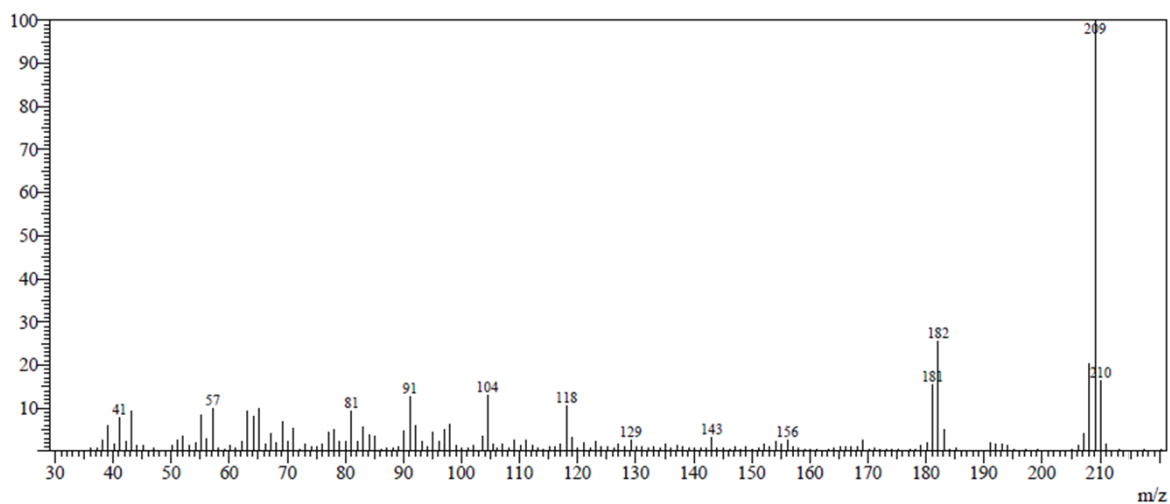

**Figure S15.** Mass spectra (EI) of *Bz1*

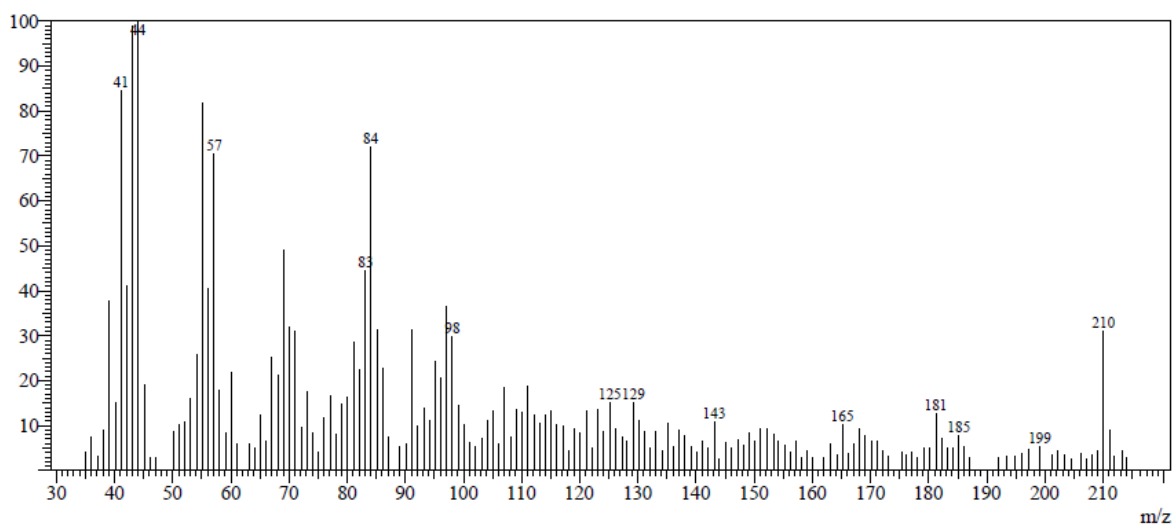

**Figure S16.** Mass spectra (EI) of *Bz2*

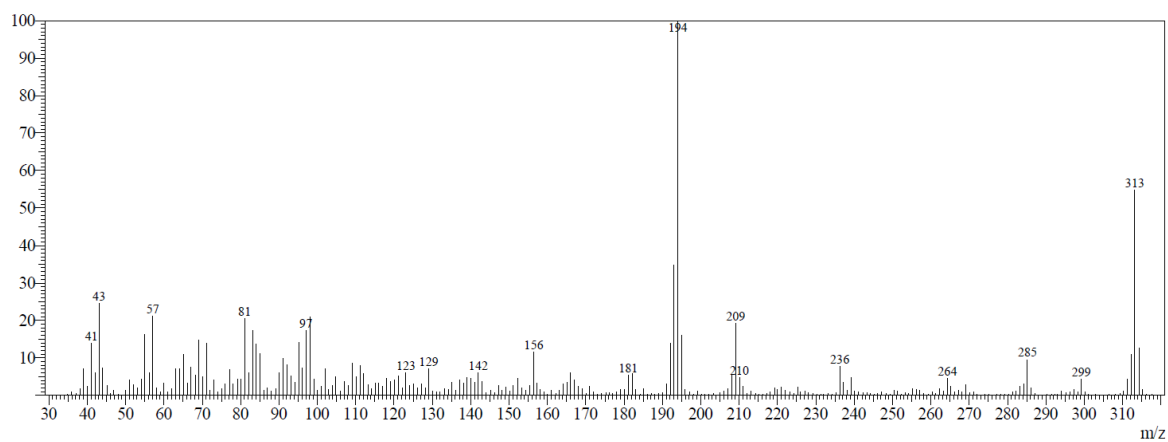

**Figure S17.** Mass spectra (EI) of *L1*

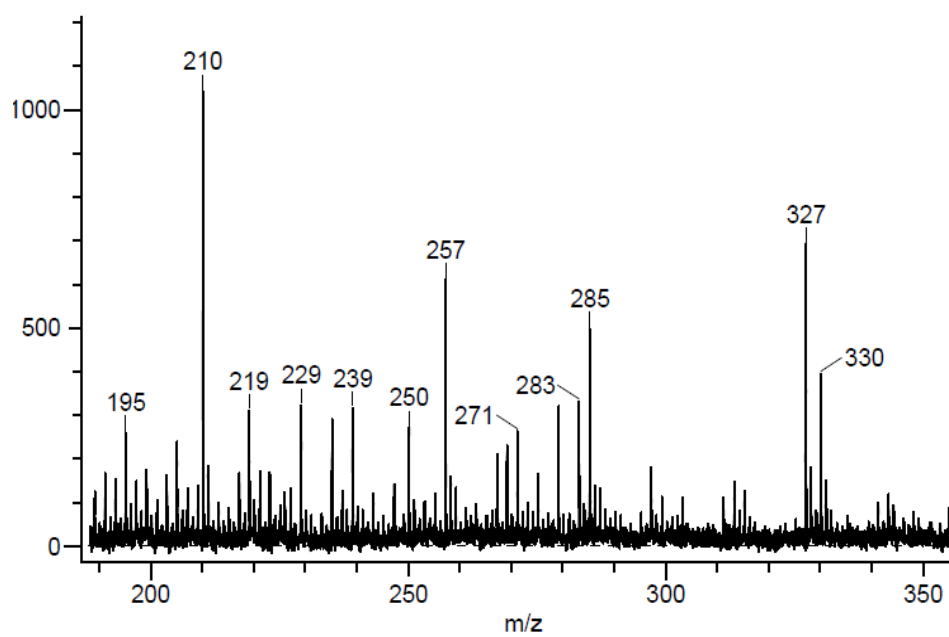

**Figure S18.** Mass spectra (DART+) of *L2* [ $M+1$ ]

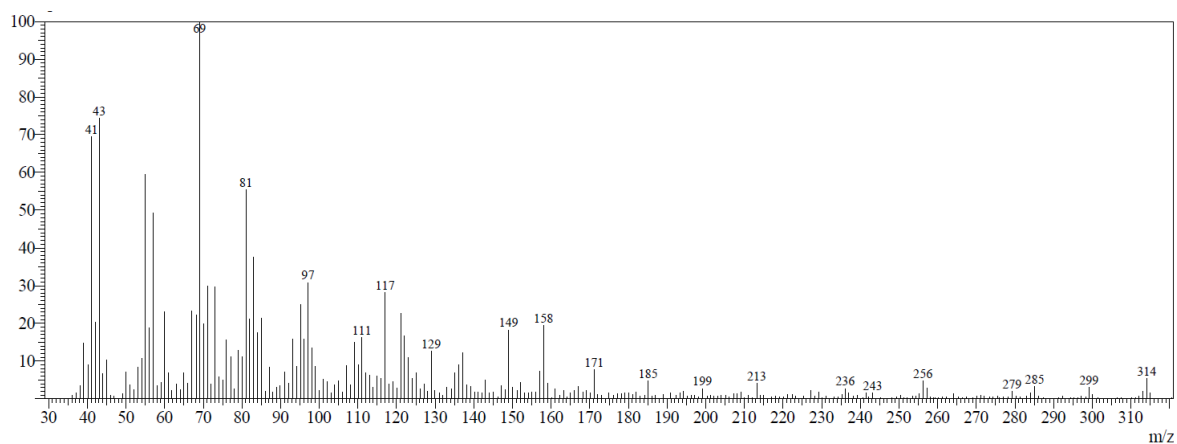

**Figure S19.** Mass spectra (EI) of *L3*

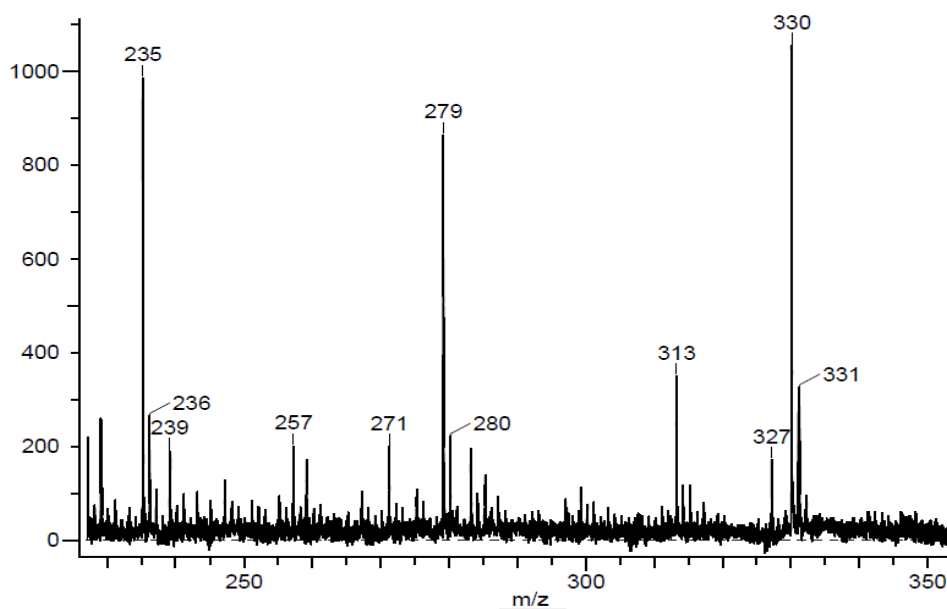

**Figure S20.** Mass spectra (DART+) of *L4* [M+1]



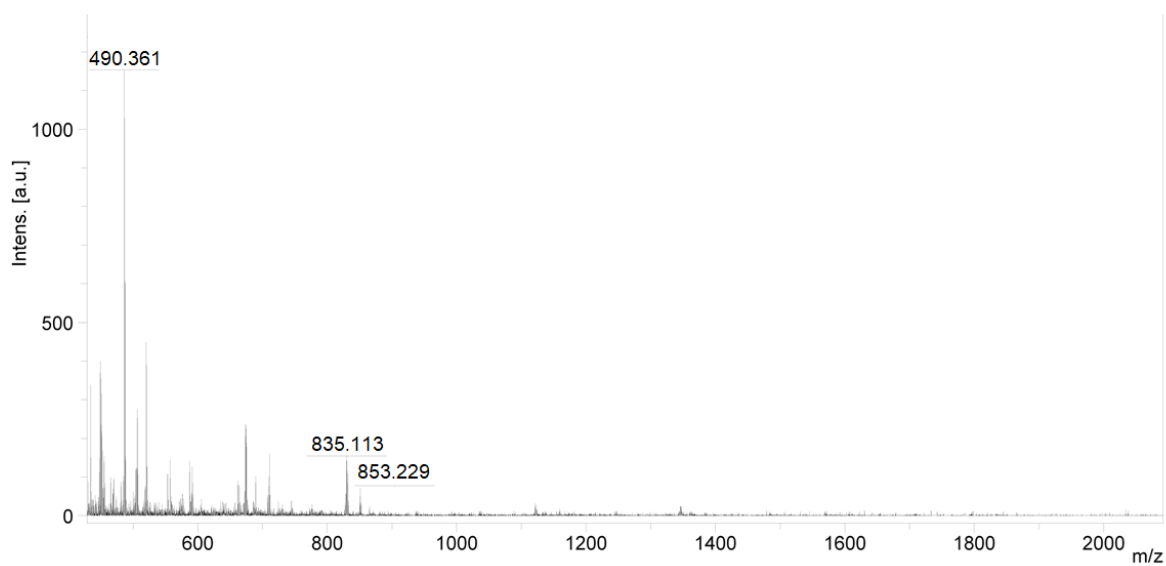

**Figure S21.** Mass spectra (MALDI-TOF) of *La-L1*

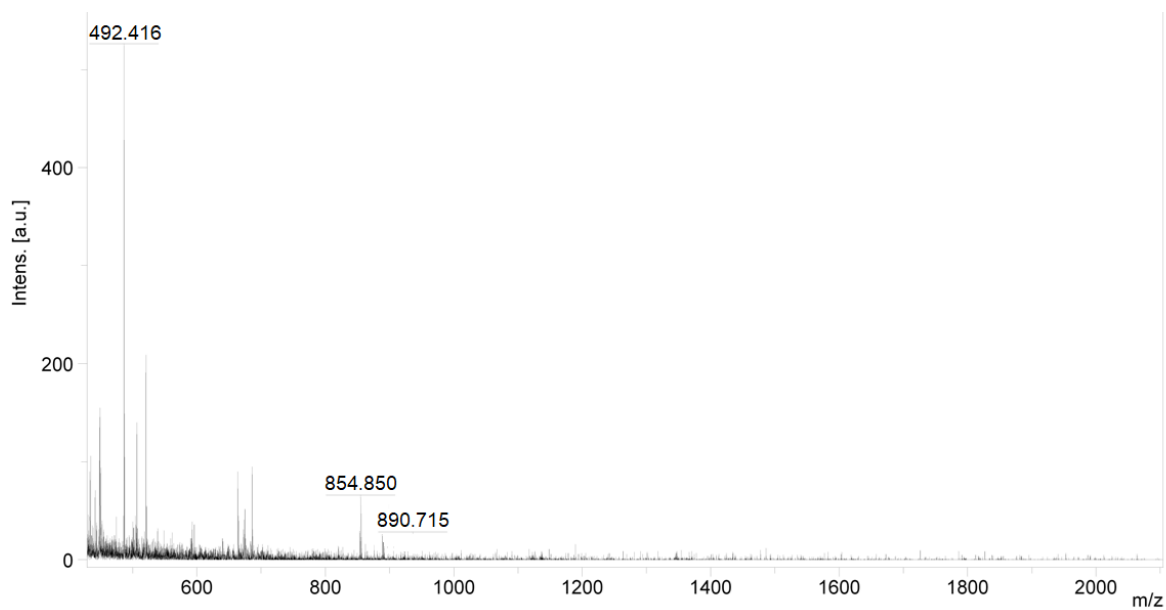

**Figure S22.** Mass spectra (MALDI-TOF) of *Ce-L1*

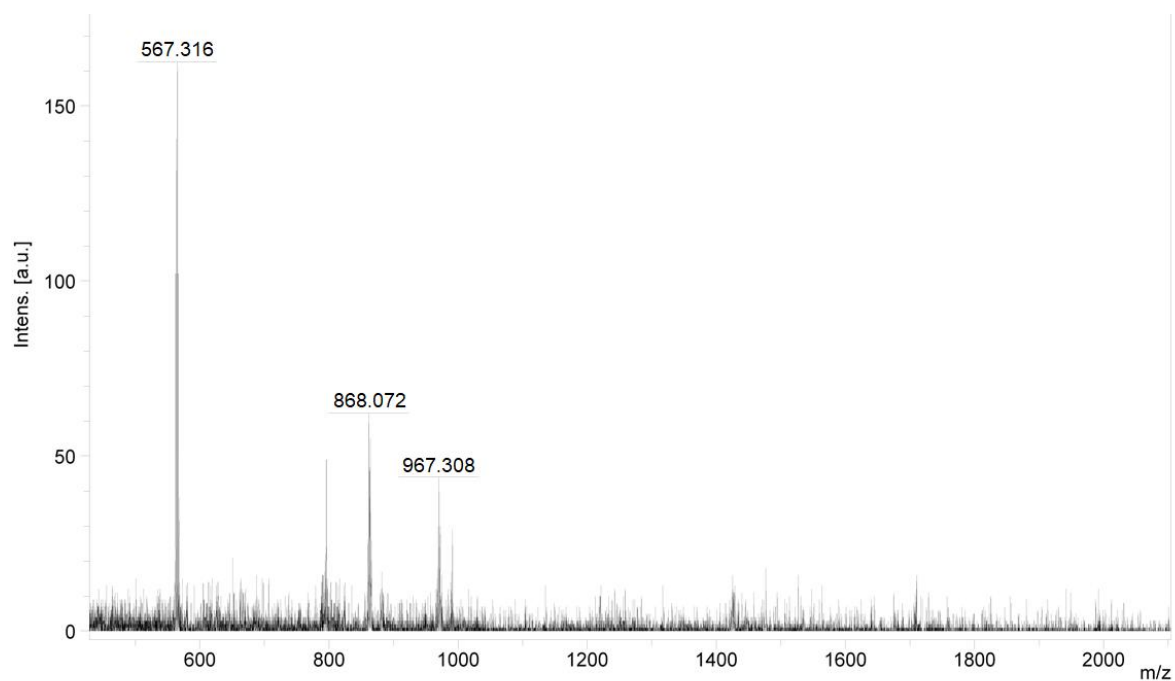

**Figure S23.** Mass spectra (MALDI-TOF) of *La-L2*

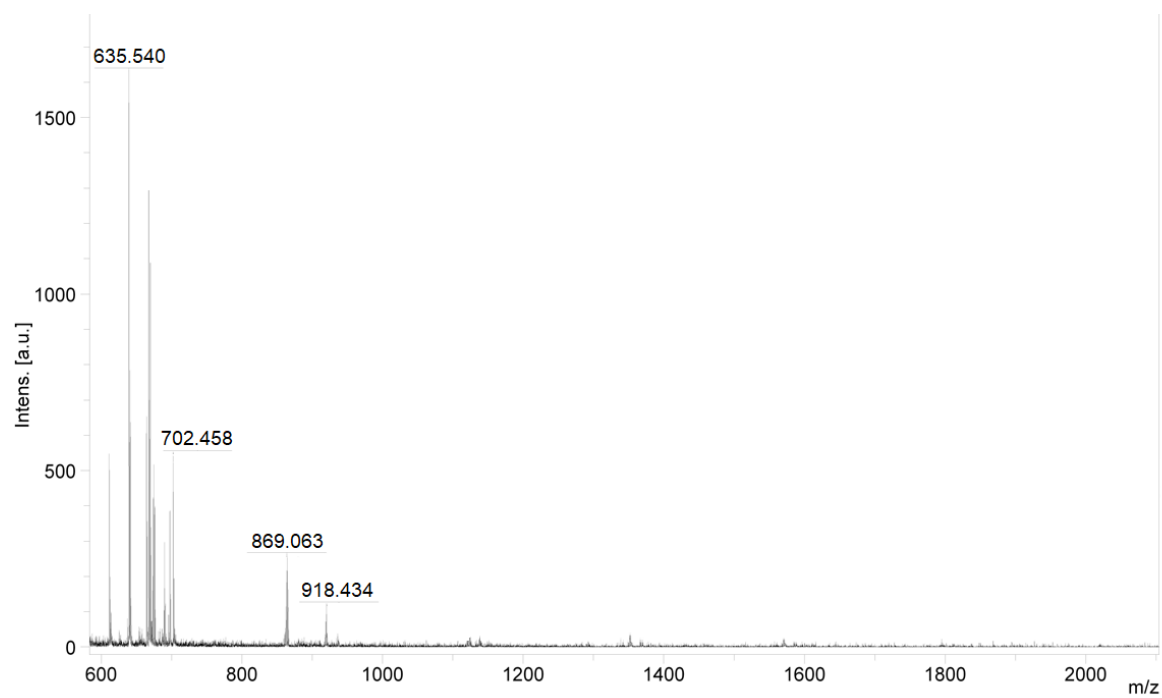

**Figure S24.** Mass spectra (MALDI-TOF) of *Ce-L2*

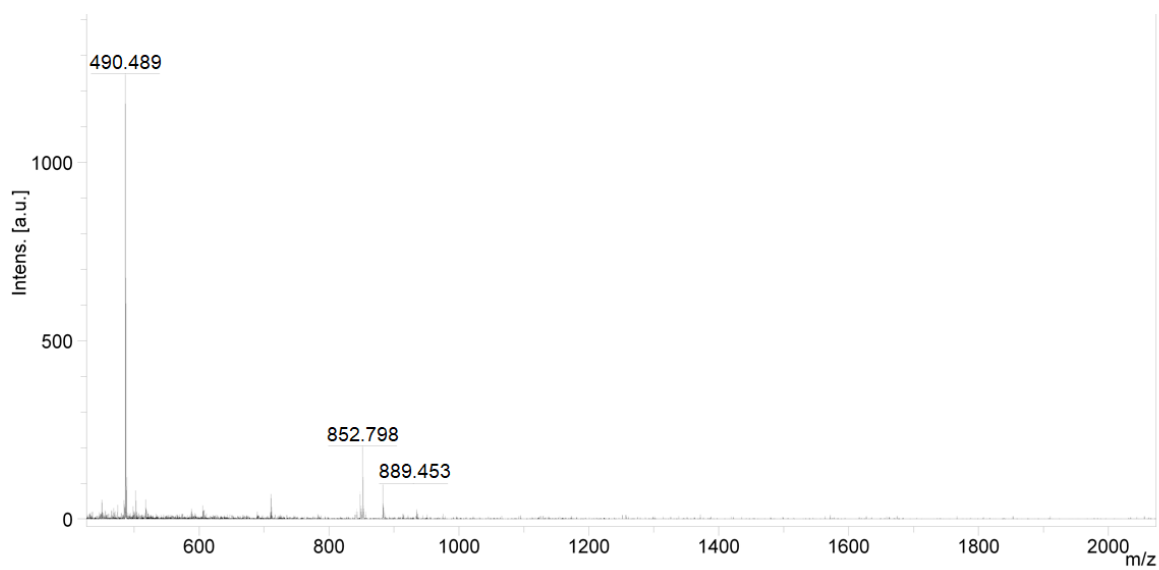

**Figure S25.** Mass spectra (MALDI-TOF) of *La-L3*

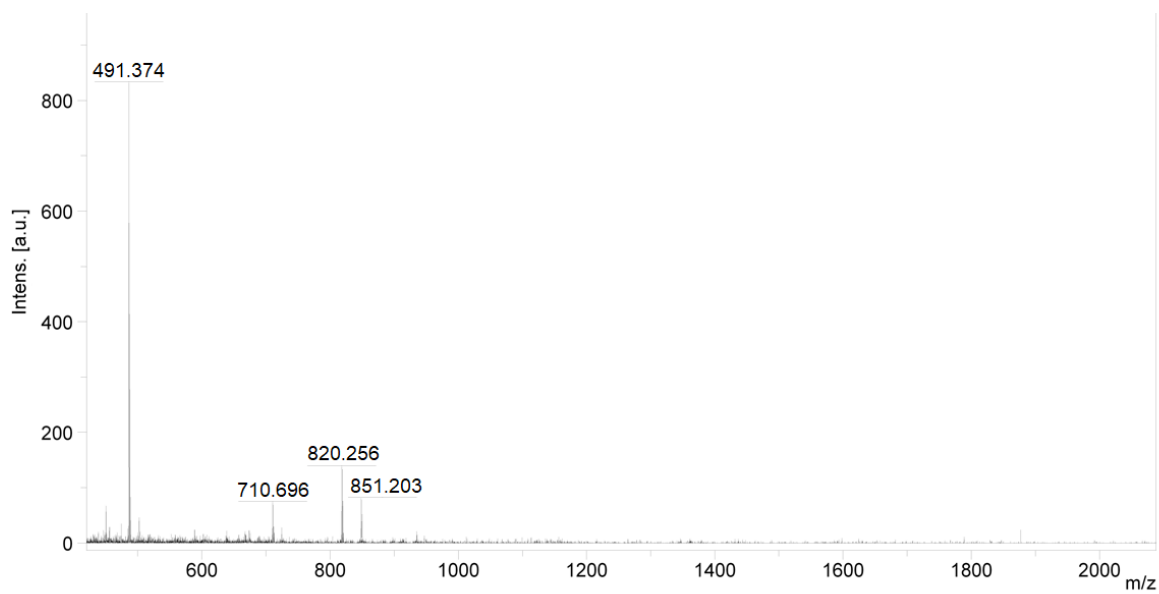

**Figure S26.** Mass spectra (MALDI-TOF) of *Ce-L3*

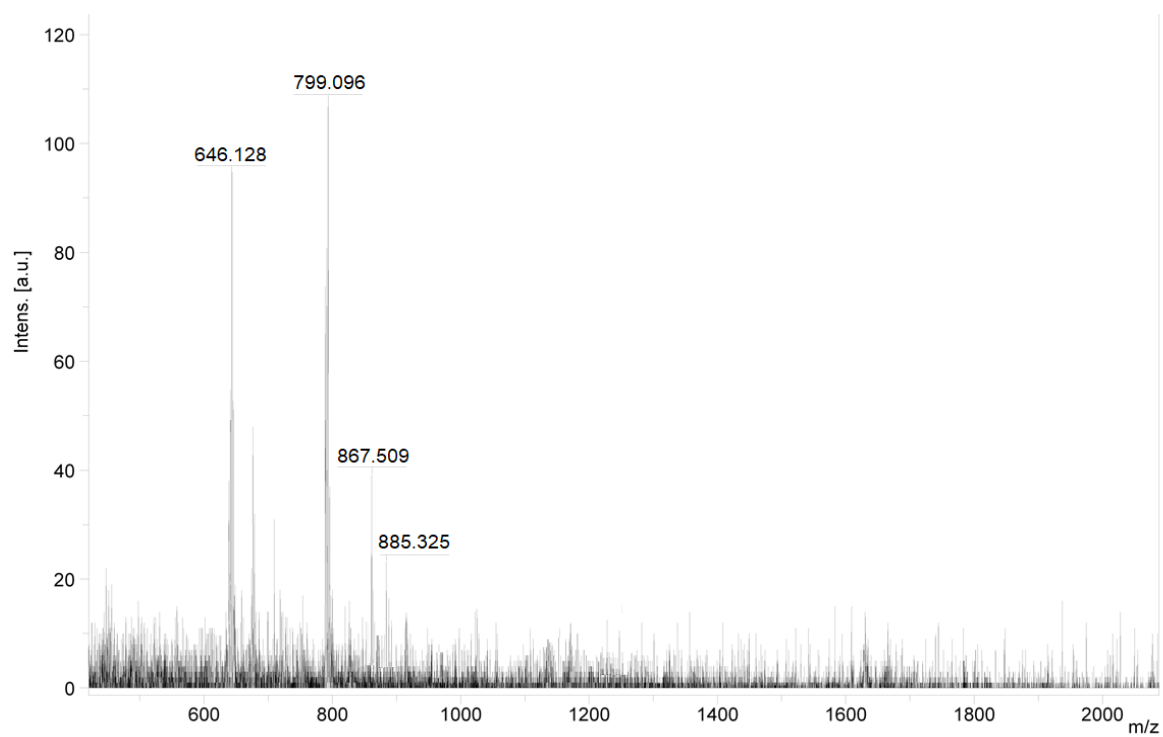

**Figure S27.** Mass spectra (MALDI-TOF) of *La-L4*

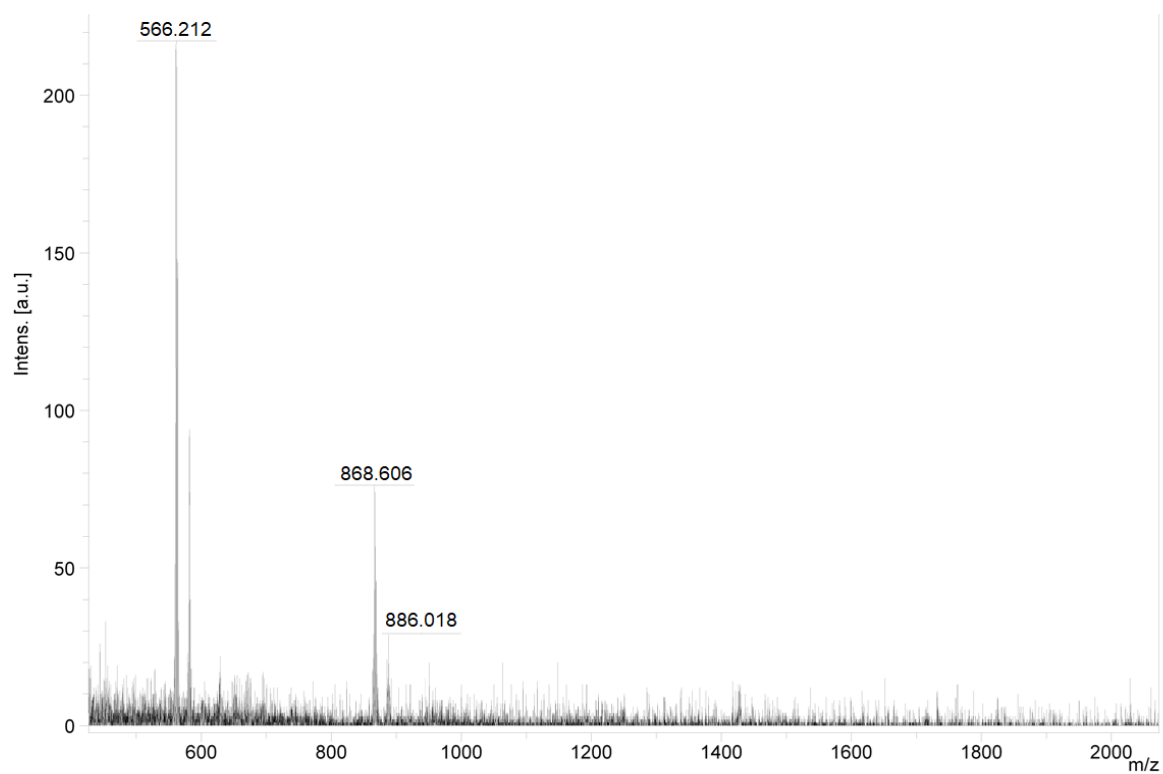

**Figure S28.** Mass spectra (MALDI-TOF) of *Ce-L4*

#### 4. TG-DTG curves

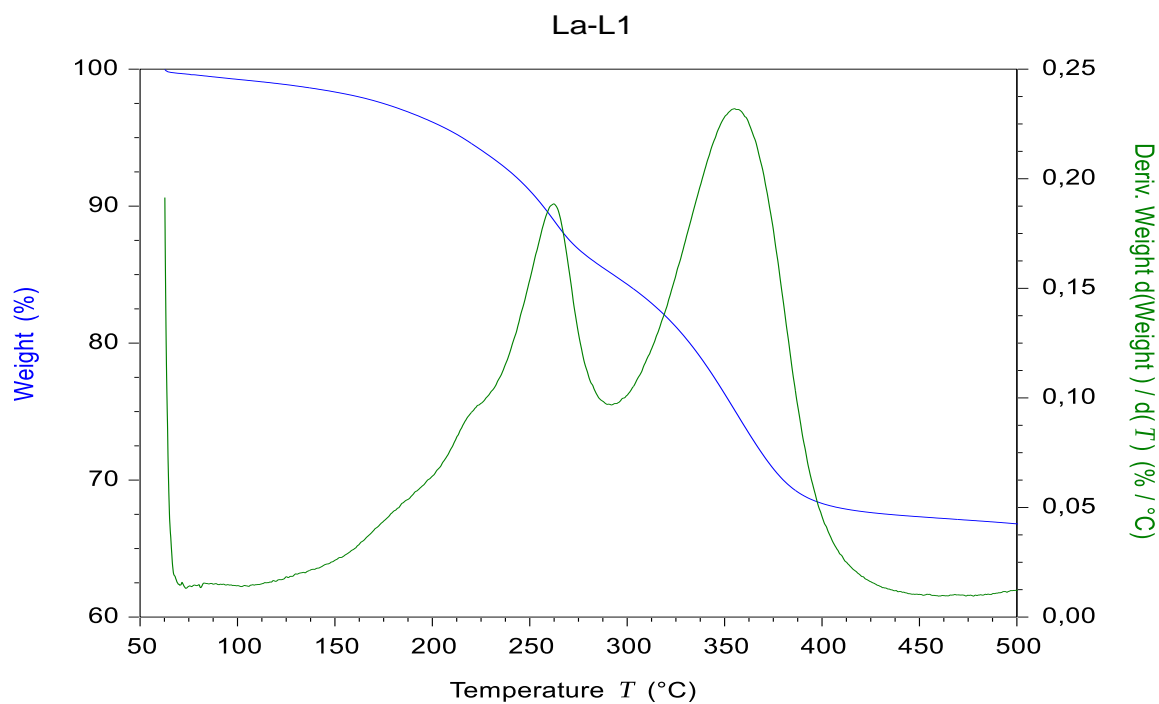

**Figure S29.** Simultaneous TG-DTG curves of *La-L1*

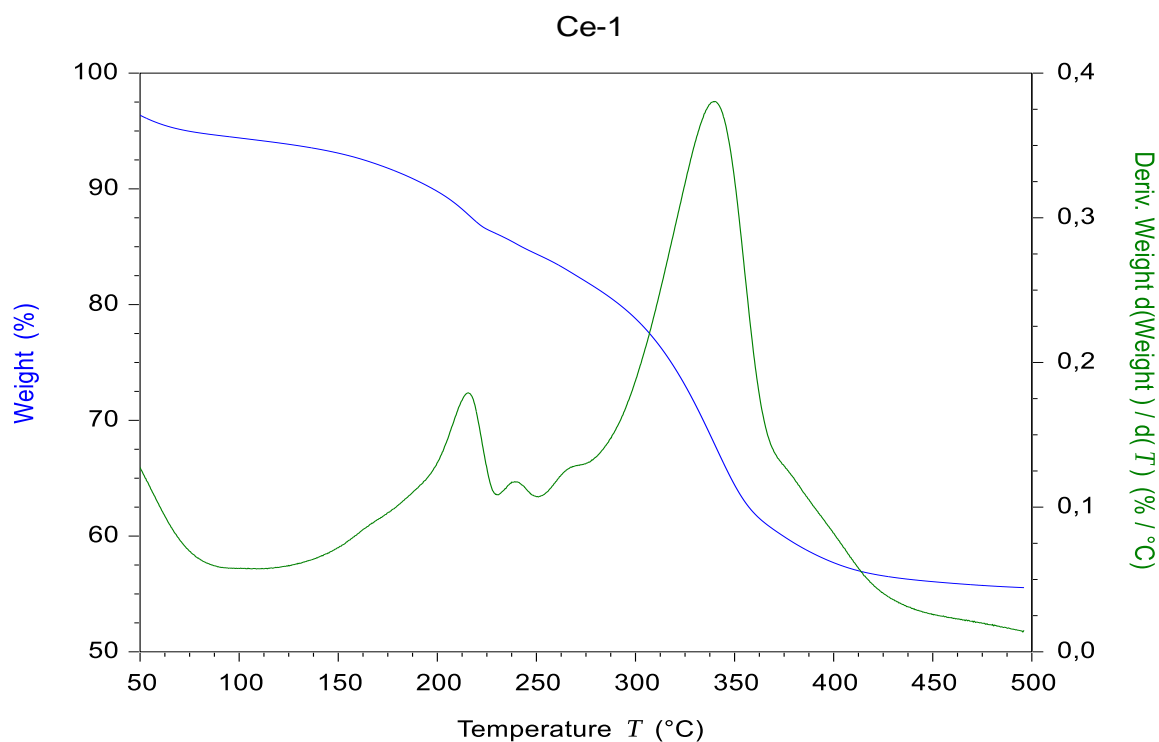

**Figure S30.** Simultaneous TG-DTG curves of *Ce-L1*

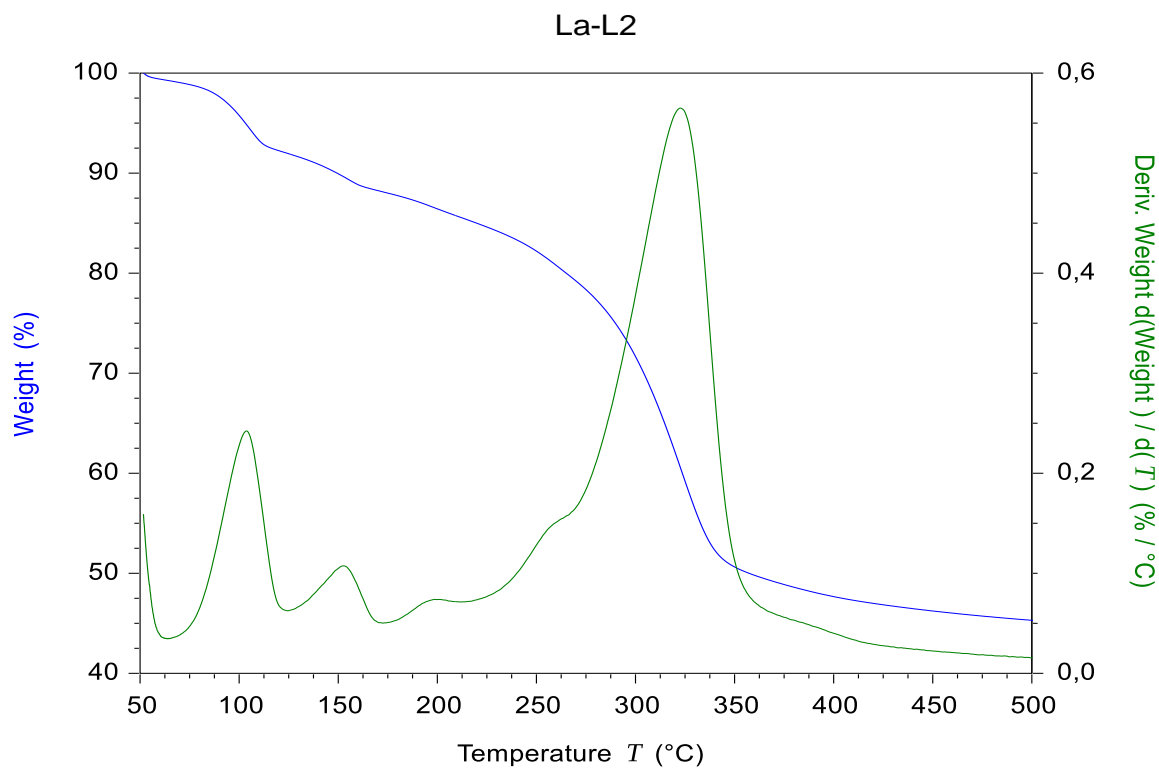

**Figure S31.** Simultaneous TG-DTG curves of *La-L2*

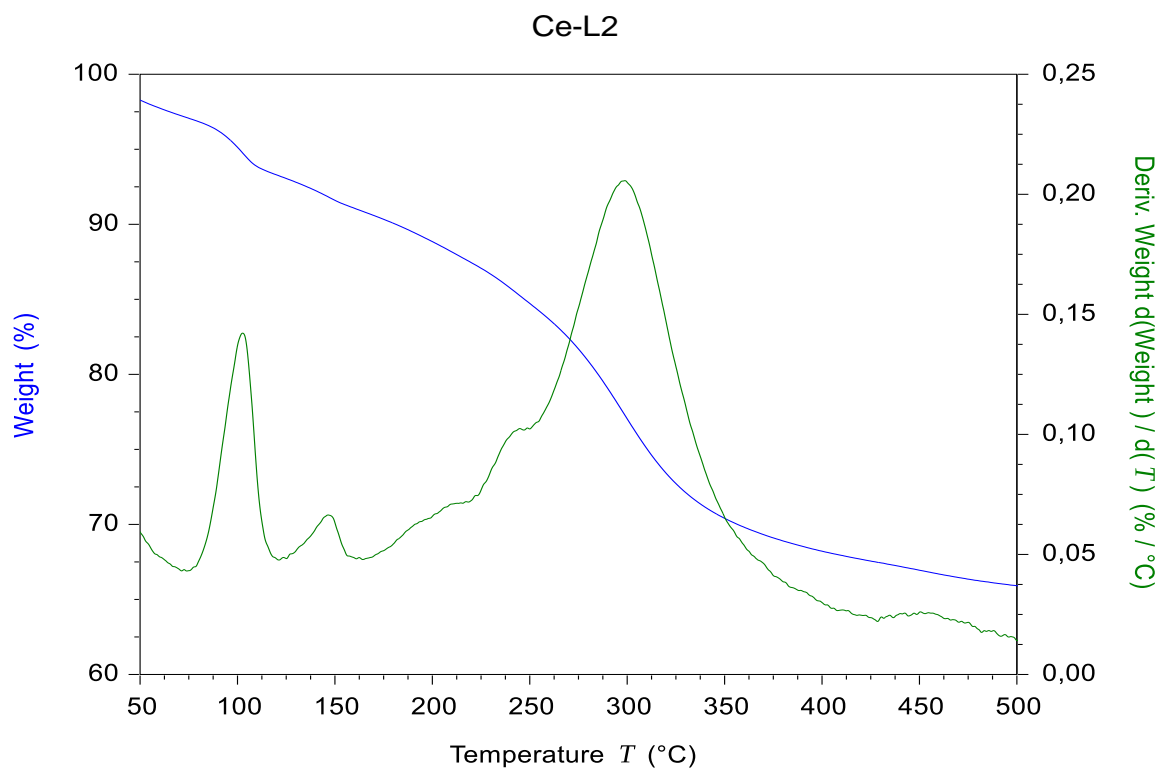

**Figure S32.** Simultaneous TG-DTG curves of *Ce-L2*

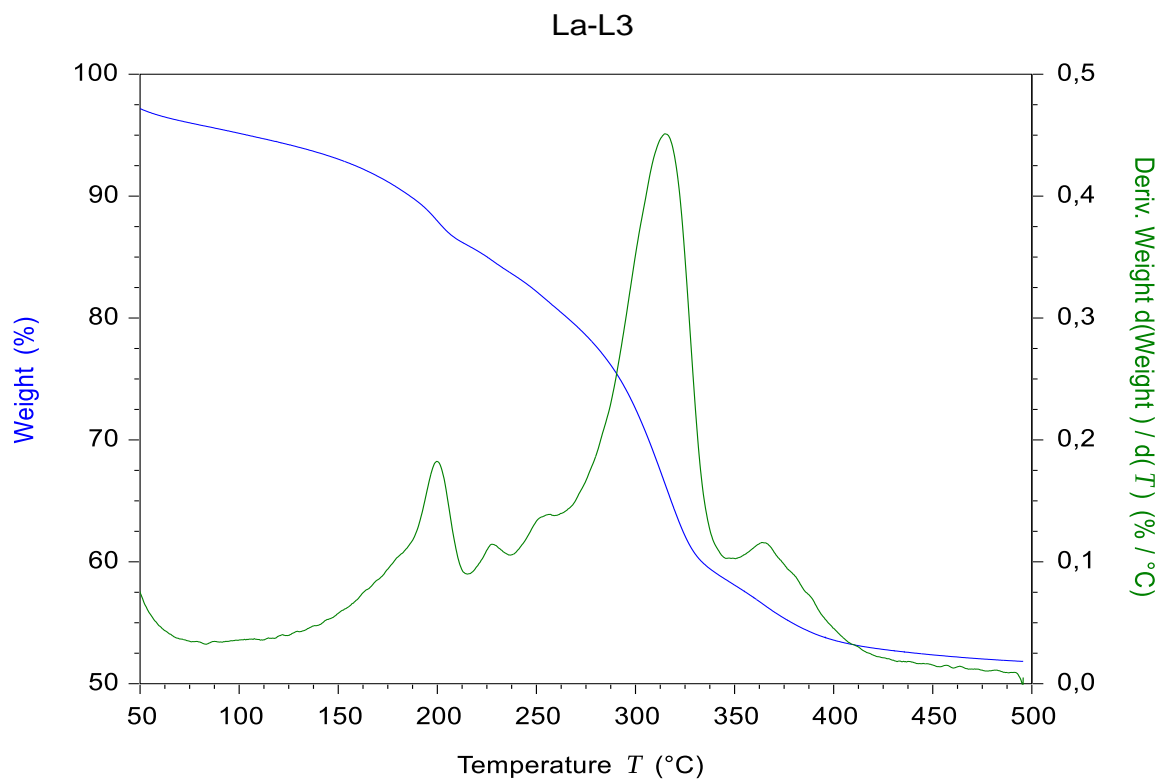

**Figure S33.** Simultaneous TG-DTG curves of *La-L3*

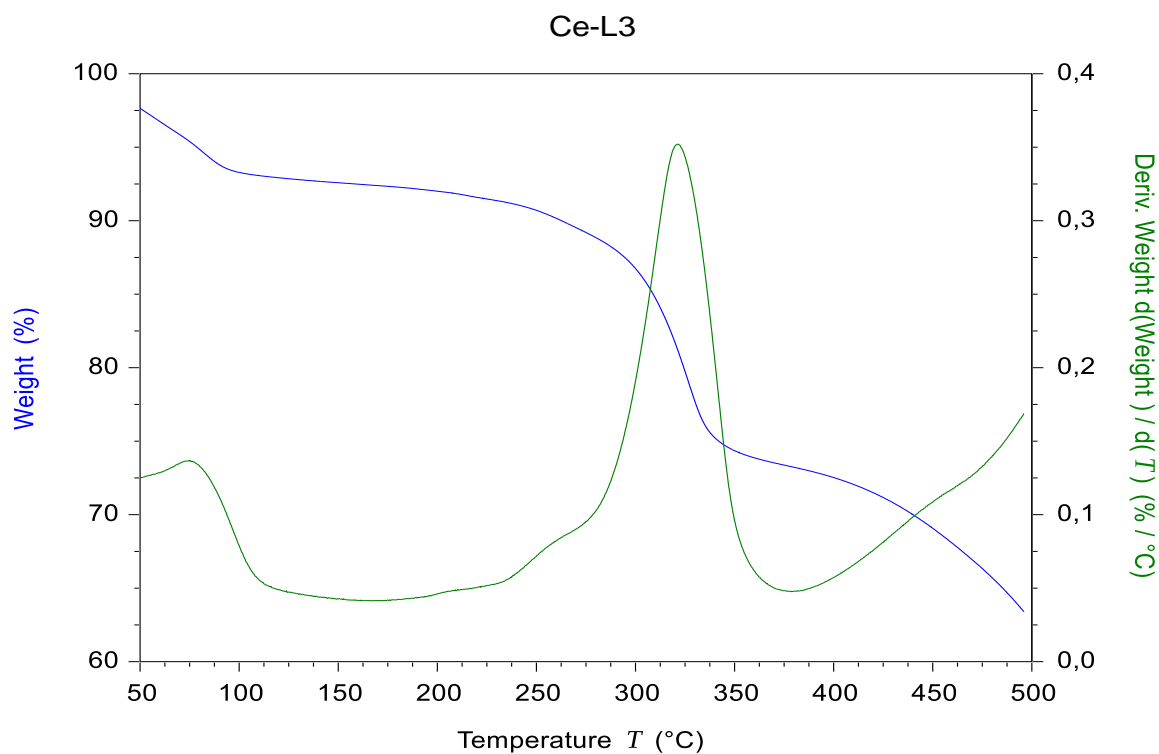

**Figure S34.** Simultaneous TG-DTG curves of *Ce-L3*

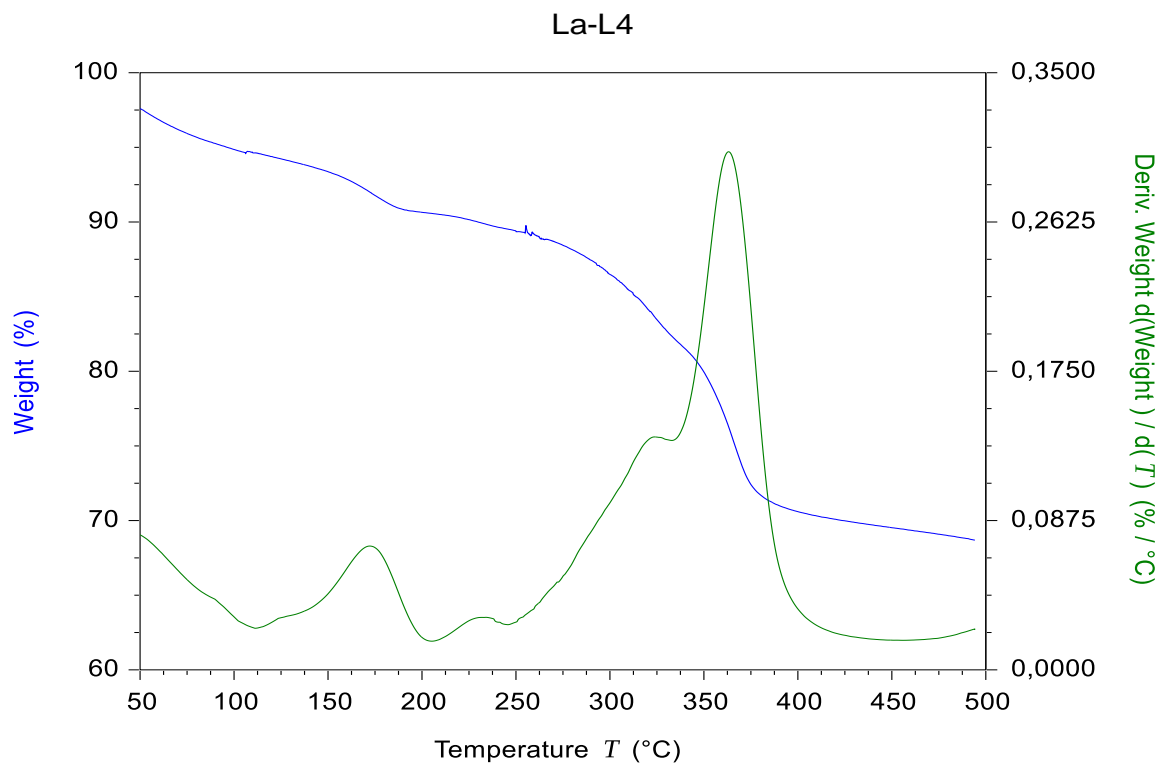

**Figure S35.** Simultaneous TG-DTG curves of *La-L4*

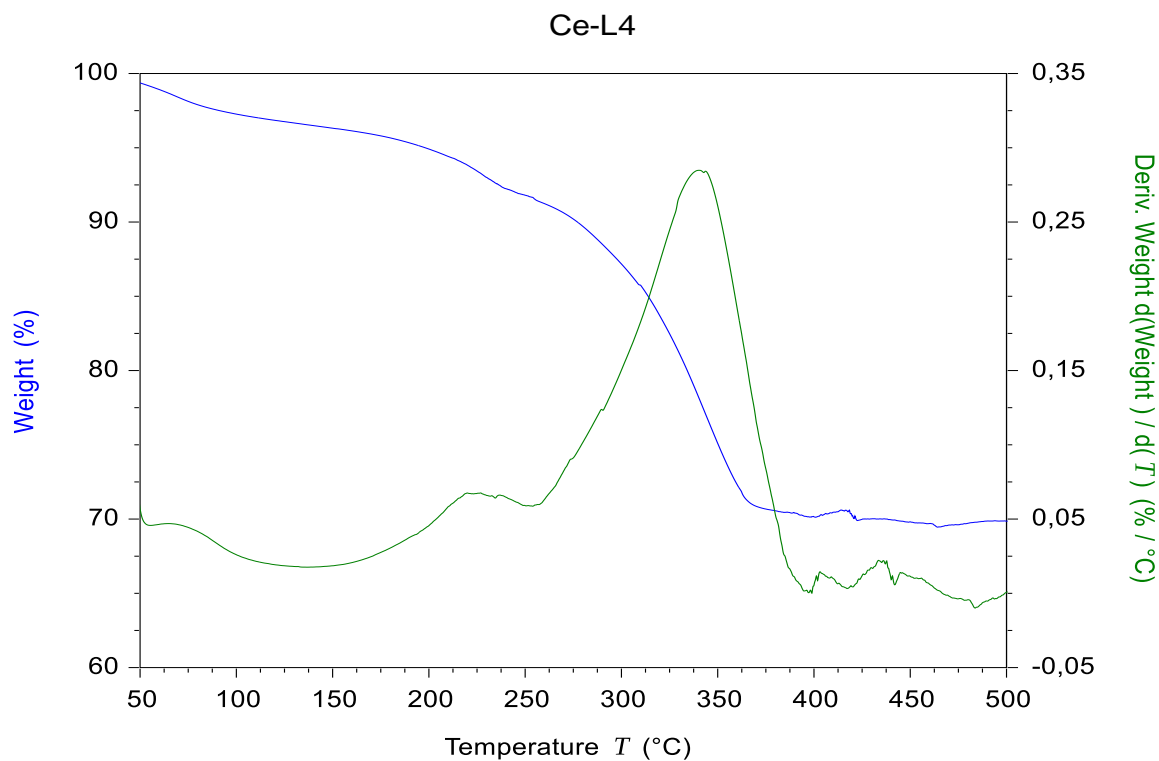

**Figure S36.** Simultaneous TG-DTG curves of *Ce-L4*



## 5. UV-Vis spectral data for DNA studies

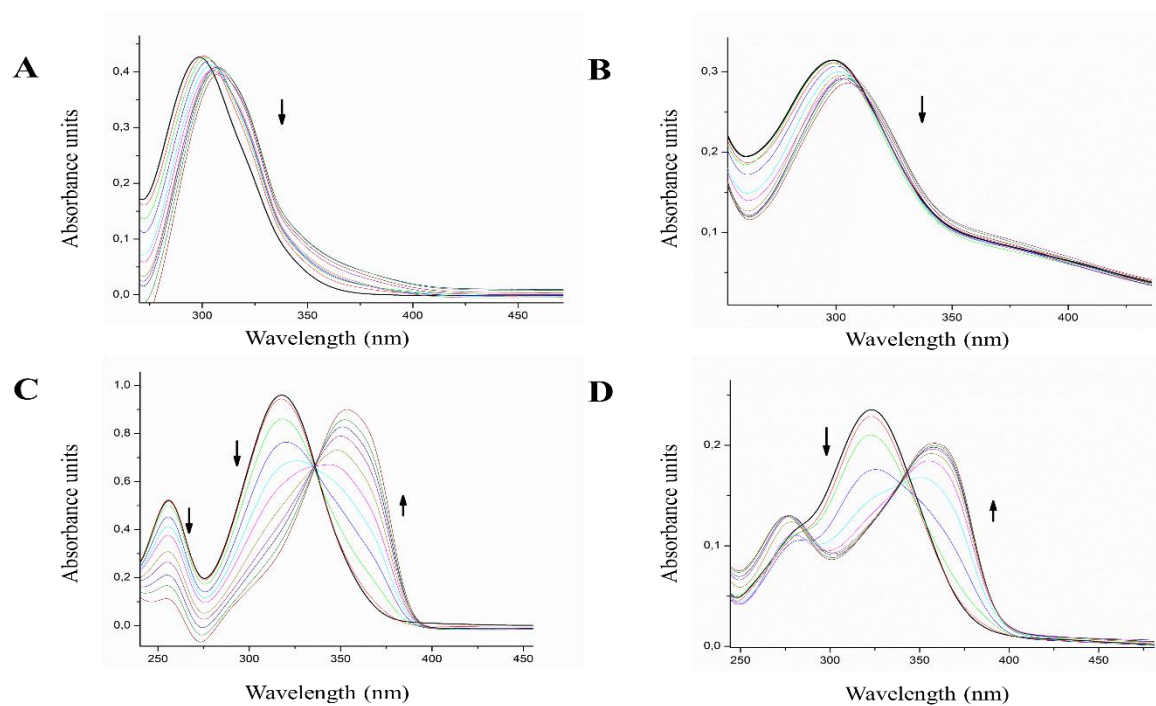

**Figure S37.** Photometric study at 60  $\mu\text{M}$  of (A) La-L1, (B) La-L2, (C) La-L3 and (D) La-L4, with CT-DNA at concentrations between 0 and 96  $\mu\text{M}$  (solid black line = 0  $\mu\text{M}$ ).

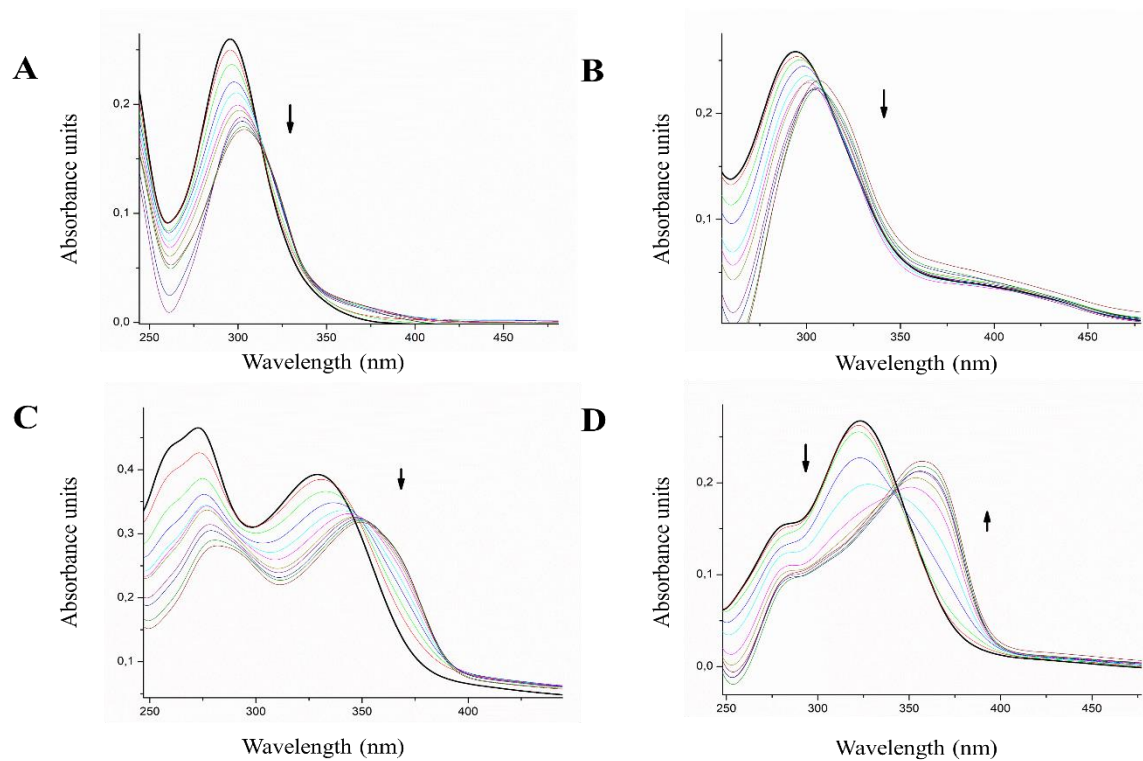

**Figure S38.** Photometric study at 60  $\mu\text{M}$  of (A) Ce-L1, (B) Ce-L2, (C) Ce-L3 and (D) Ce-L4, with CT-DNA at concentrations between 0 and 96  $\mu\text{M}$  (solid black line = 0  $\mu\text{M}$ ).

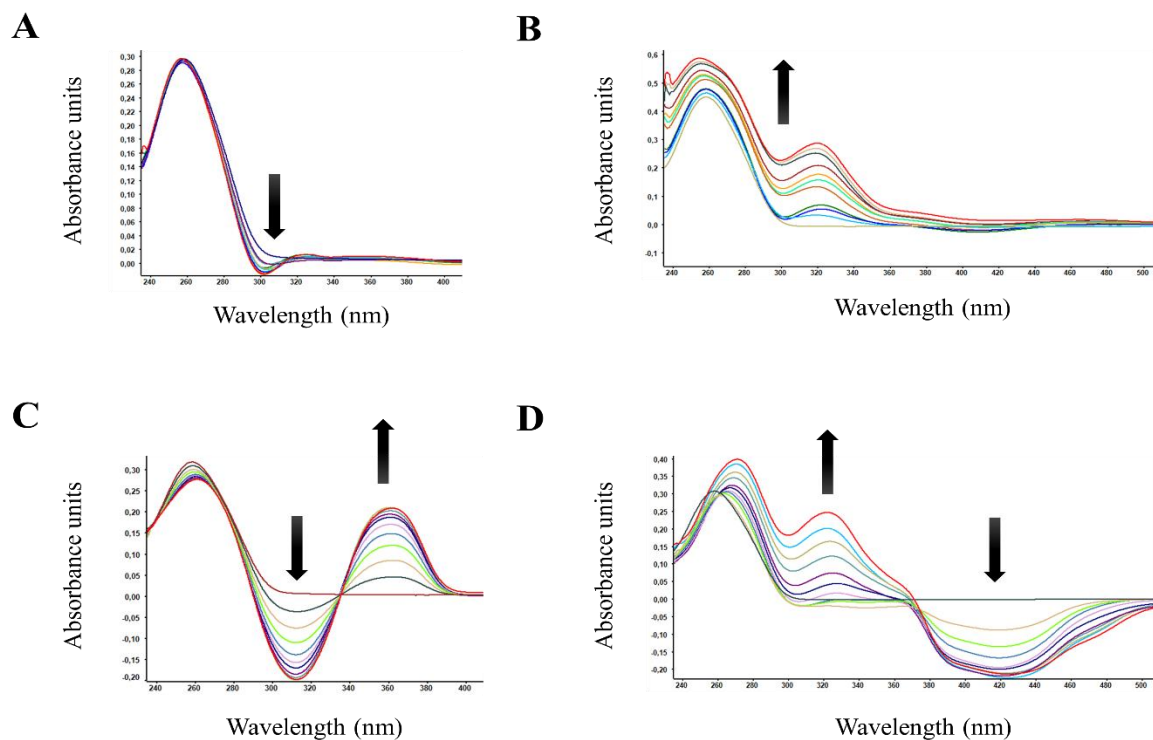

**Figure S39.** Photometric study of CT-DNA at 48  $\mu\text{M}$  with (A) L1, (B) L2, (C) L3 and (D) L4, at concentrations between 0 and 60  $\mu\text{M}$ .

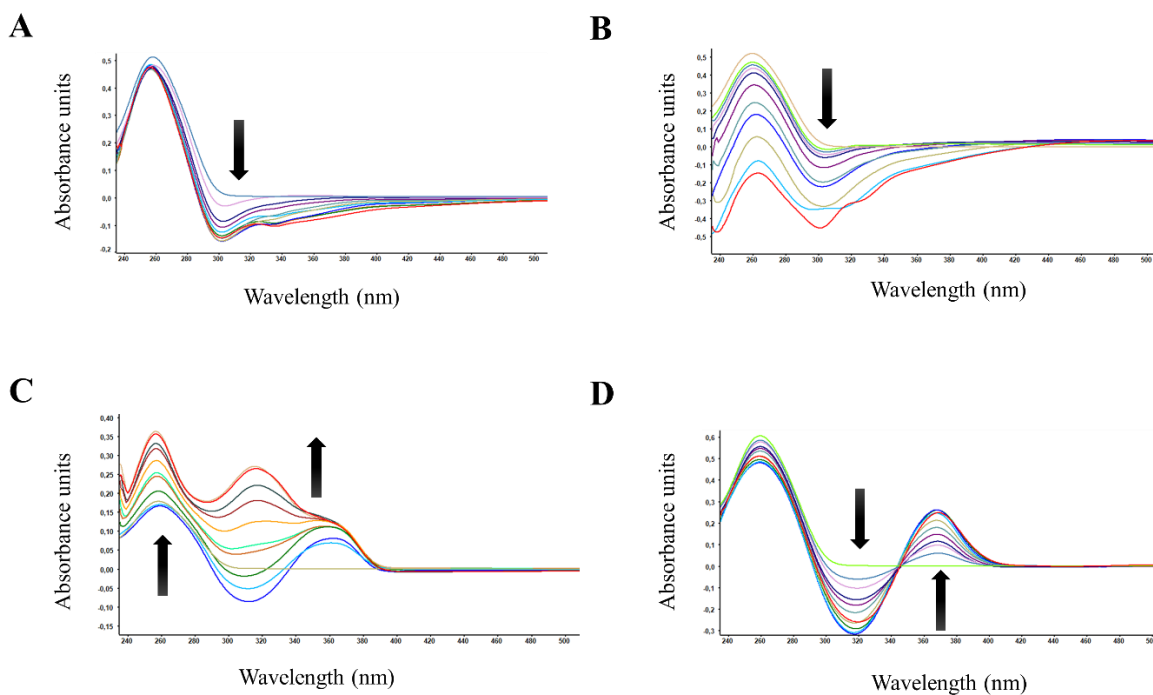

**Figure S40.** Photometric study of CT-DNA at 48  $\mu\text{M}$  with (A) La-L1, (B) La-L2, (C) La-L3 and (D) La-L4, at concentrations between 0 and 60  $\mu\text{M}$ .

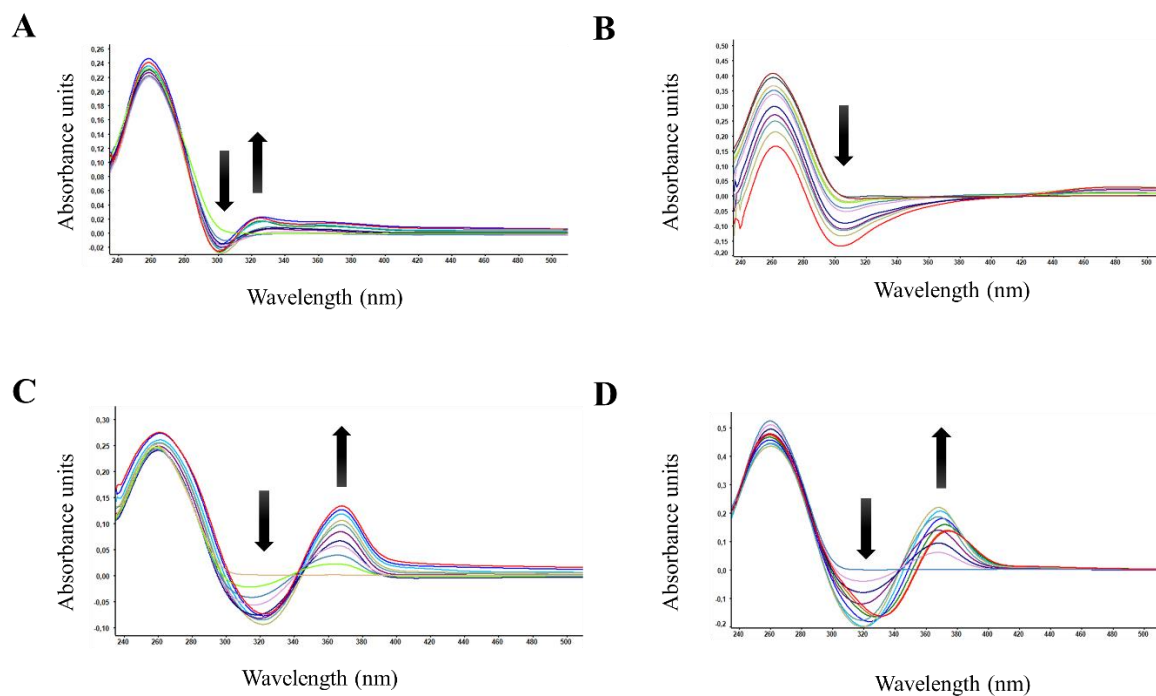

**Figure S41.** Photometric study of CT-DNA at 48  $\mu\text{M}$  with (A) Ce-L1, (B) Ce-L2, (C) Ce-L3 and (D) Ce-L4, at concentrations between 0 and 60  $\mu\text{M}$  (solid black line = 0  $\mu\text{M}$ ).

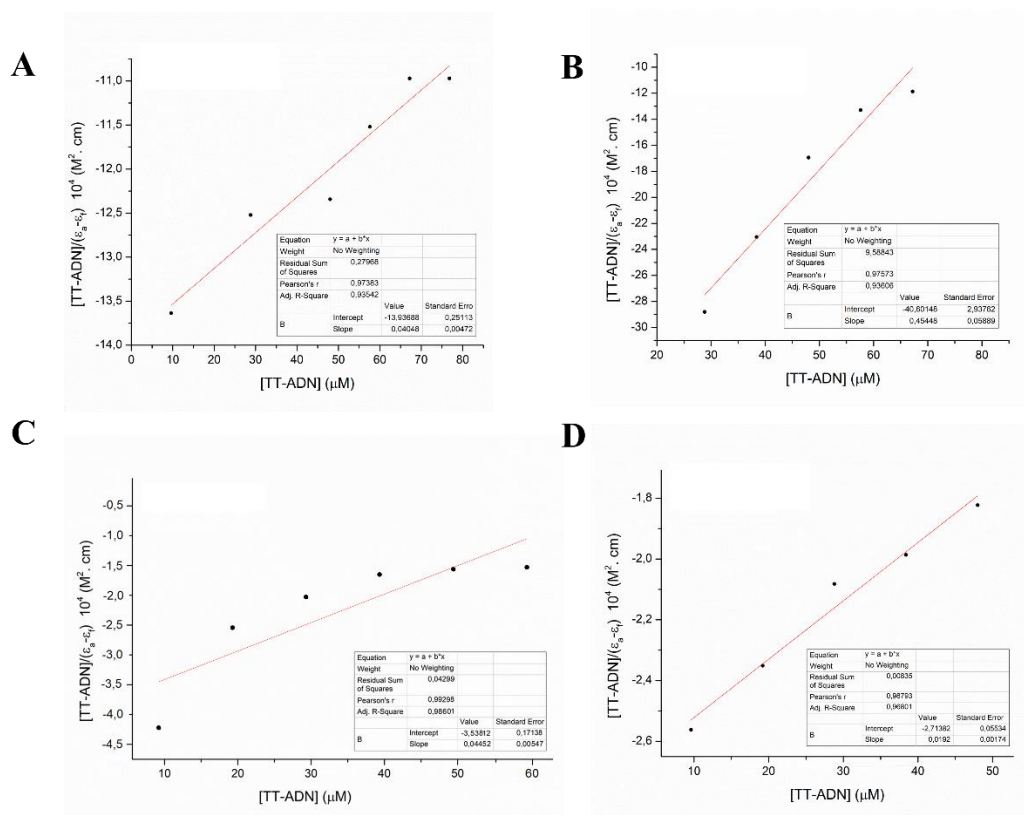

**Figure S42.** Wolf-Shimer plots for (A) L1, (B) L2, (C) L3 and (D) L4.

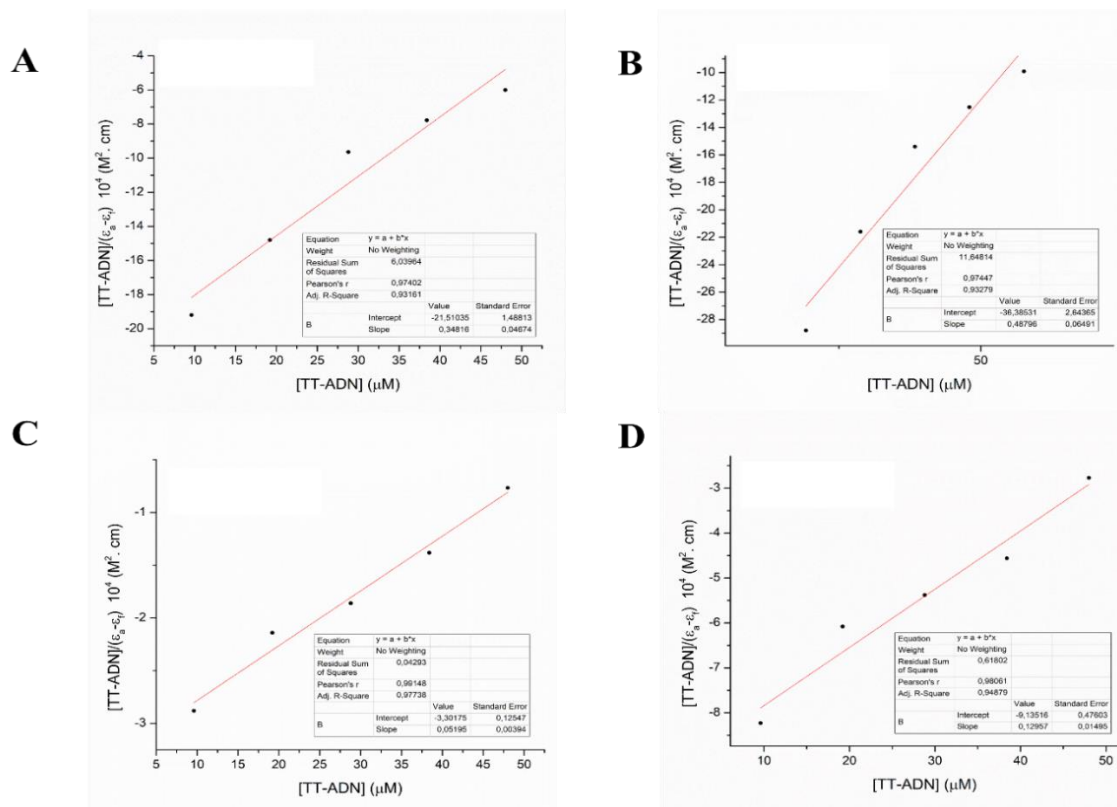

**Figure S43.** Wolf-Shimer plots for (A) La-L1, (B) La-L2, (C) La-L3 and (D) La-L4.

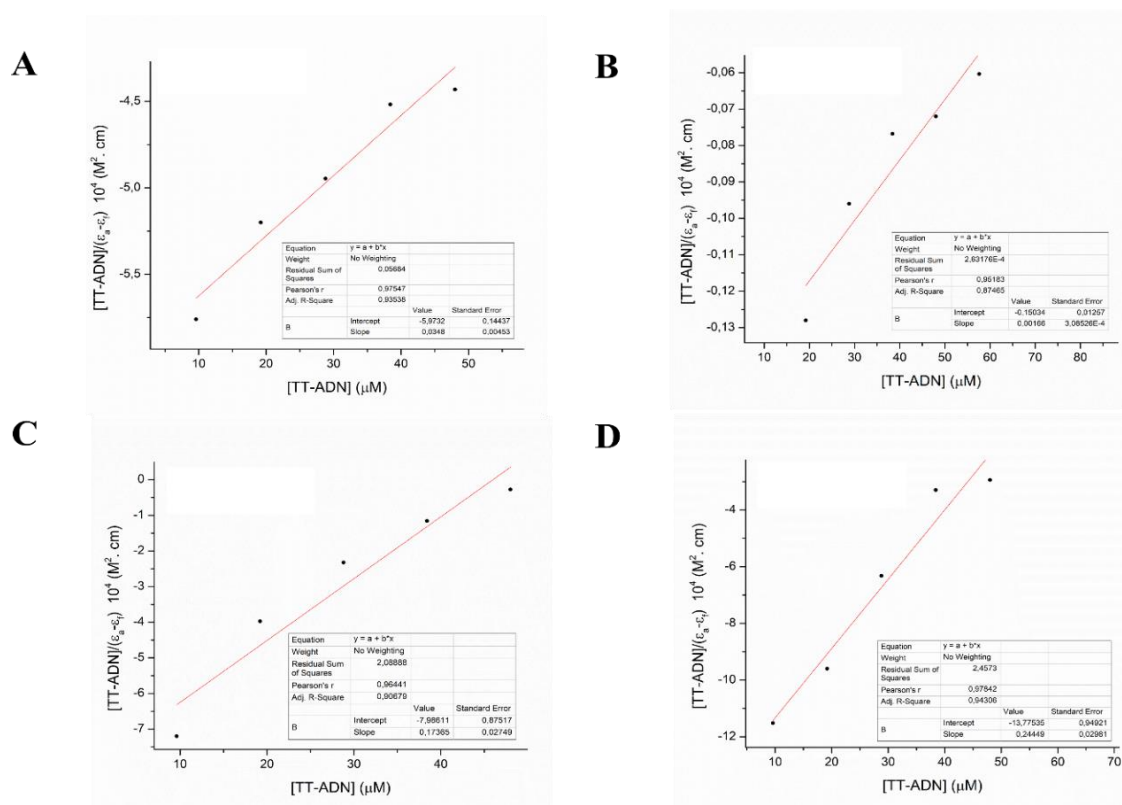

**Figure S44.** Wolf-Shimer plots for (A) Ce-L1, (B) Ce-L2, (C) Ce-L3 and (D) Ce-L4.

## 6. Molecular docking studies

**Table S3.** Interaction of the molecules with the cruzain

| Molecule     | Binding energy<br>kcal/mol | Hydrogen bonds                                                                                                               | Electrostatic bond | Hydrophobic bond                                                                                        |
|--------------|----------------------------|------------------------------------------------------------------------------------------------------------------------------|--------------------|---------------------------------------------------------------------------------------------------------|
| L1           | -7.56                      | Ligand - B:CYS25;<br>Ligand - B:SER64                                                                                        | NA                 | Ligand - B:ASP161;<br>Ligand - B:ALA138;<br>Ligand - B:CYS25                                            |
| L2           | -6.92                      | Ligand - A:LEU160;<br>Ligand - B:ASP60;<br>Ligand - B:SER64                                                                  | NA                 | Ligand - A:ASP161;<br>Ligand - A:HIS162;<br>Ligand - B:GLY65;<br>Ligand - B:GLY66;<br>Ligand - A:ALA138 |
| L3           | -7.86                      | Ligand - B:CYS63;<br>Ligand - B:CYS25;<br>Ligand - B:GLY66                                                                   | Ligand - A:ASP161  | Ligand - B:HIS162;<br>Ligand - B:GLY163;<br>Ligand - B:ALA138;<br>Ligand - B:CYS25                      |
| L4           | -7.96                      | Ligand - B:CYS25;<br>Ligand - B:CYS63                                                                                        | Ligand - A:ASP161  | Ligand - B:SER64;<br>Ligand - B:ASP161;<br>Ligand - B:ALA138;<br>Ligand - B:CYS25                       |
| La-L1        | -11.58                     | Ligand - B:SER64;<br>Ligand - A:LEU160                                                                                       | NA                 | NA                                                                                                      |
| La-L2        | -10.81                     | Ligand - B:ASP161;<br>Ligand - B:LEU160;<br>Ligand - B:CYS63;<br>Ligand - B:GLY23;<br>Ligand - A:SER64                       | NA                 | Ligand - B:ASP161;<br>Ligand - HIS162;<br>Ligand - B:ALA138                                             |
| La-L3        | -11.1                      | Ligand - A:CYS25                                                                                                             | Ligand - B:ASP161  | Ligand - A:ASP161;<br>Ligand - HIS162;<br>Ligand - A:LEU67                                              |
| La-L4        | -10.63                     | Ligand - A:GLN159;<br>Ligand - B:ASP161;<br>Ligand - B:SER64;<br>Ligand - B:THR59;<br>Ligand - A:LEU160;<br>Ligand - B:CYS25 | Ligand - A:GLU239  | Ligand - A:PRO213;<br>Ligand - B:ILE309;<br>Ligand - A:VAL277                                           |
| Ce-L1        | -10.88                     | Ligand - A:SER64;<br>Ligand - A:ASP161;<br>Ligand - B:SER64;<br>Ligand - B:CYS63                                             | NA                 | Ligand - A:HIS162;<br>Ligand - B:CYS25;<br>Ligand - A:LEU67;<br>Ligand - A:ALA138;<br>Ligand - A:LEU160 |
| Ce-L2        | -10.35                     | Ligand - A:SER142                                                                                                            | NA                 | Ligand - A:TRP184;<br>Ligand - A:CYS22;<br>Ligand - A:CYS25                                             |
| Ce-L3        | -10.98                     | Ligand - B:SER64;<br>Ligand - A:SER64                                                                                        | NA                 | Ligand - A:LEU67;<br>Ligand - A:CYS25;<br>Ligand - A:CYS63                                              |
| Ce-L4        | -11.08                     | Ligand - B:CYS63;<br>Ligand - B:GLU208;<br>Ligand - B:ASP16                                                                  | Ligand - A:ASP161  | Ligand - A:HIS162;<br>Ligand - B:ASP161;<br>Ligand - B:ALA138;<br>Ligand - A:ALA141                     |
| Vinilsulfone | -4.3                       | Ligand - A:VAL139;<br>Ligand - A:ASP161;<br>Ligand - A:HIS162                                                                | NA                 | NA                                                                                                      |

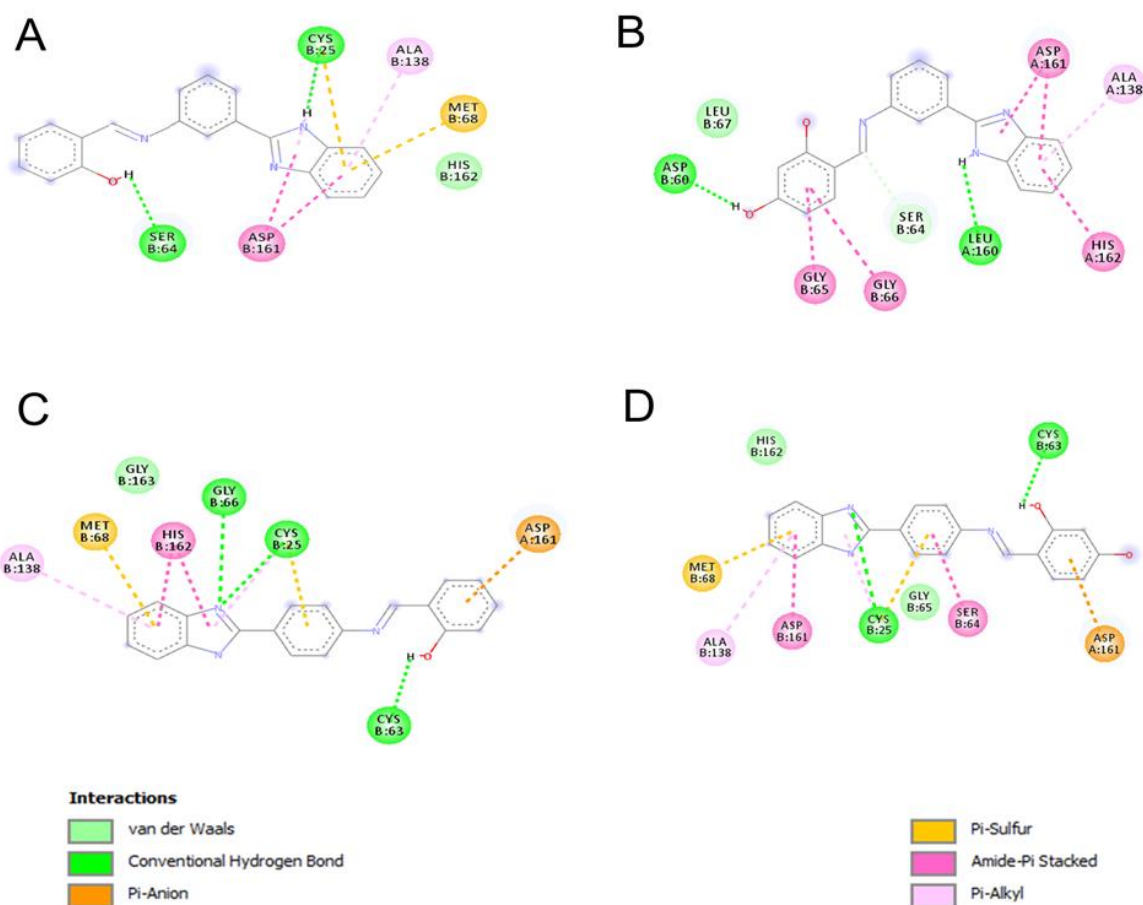

**Figure S45.** Interaction between ligands and cruzain residues. (A) Ligand 1 (B) Ligand 2 (C) Ligand 3 (D) Ligand 4.

**Table S4.** Interaction of the molecules with the leishmanin

| Molecule       | Binding energy kcal/mol | Hydrogen bonds                                                                                                                                        | Electrostatic bond | Hydrophobic bond                                                                                                                |
|----------------|-------------------------|-------------------------------------------------------------------------------------------------------------------------------------------------------|--------------------|---------------------------------------------------------------------------------------------------------------------------------|
| L2             | -8.78                   | Ligand - A:ALA349;<br>Ligand - A:GLY222;                                                                                                              | Ligand - A:ASP342  | Ligand - A:ALA349;<br>Ligand- A:ALA350;<br>Ligand - A:ALA348;<br>Ligand - A:PRO416;<br>Ligand - A:PRO460;<br>Ligand - A:LEU224  |
| La-L2          | -9.79                   | Ligand - A:ALA349;<br>Ligand - A:GLU265                                                                                                               | NA                 | Ligand - A:ALA348;<br>Ligand - A:PRO460;<br>Ligand - A:LEU257;<br>Ligand - A:ALA350;<br>Ligand - A:VAL223;<br>Ligand - A:LEU420 |
| Anfotericina B | -6.80                   | Ligand - A:LYS573;<br>Ligand - A:GLN166;<br>Ligand - A:THR169;<br>Ligand - A:ASP371;<br>Ligand - A:THR517;<br>Ligand - A:ALA572;<br>Ligand - A:LYS173 | NA                 | NA                                                                                                                              |

**Table S5.** Interaction of the molecules with alpha tubulin

| Molecule    | Binding energy kcal/mol | Hydrogen bonds                                                                                            | Electrostatic bond                      | Hydrophobic bond                                                                                          |
|-------------|-------------------------|-----------------------------------------------------------------------------------------------------------|-----------------------------------------|-----------------------------------------------------------------------------------------------------------|
| L1          | -6.78                   | Ligand - A:PRO261;<br>Ligand - A:ASP431                                                                   | NA                                      | Ligand - A:TYR262;<br>Ligand - A:TYR453;<br>Ligand - A:PRO263;<br>Ligand - A:ALA451;<br>Ligand - A:VAL435 |
| L2          | -6.23                   | Ligand - A:THR198;<br>Ligand - A:LYS166                                                                   | Ligand - A:ASP431                       | Ligand - A:TYR262;<br>Ligand - A:PRO263;<br>Ligand - A:ARG264                                             |
| L3          | -5.48                   | Ligand - A:ALA451                                                                                         | NA                                      | Ligand - A:ALA451;<br>Ligand - A:TYR453;<br>Ligand - A:PRO263                                             |
| L4          | -5.41                   | Ligand - A:ASP431                                                                                         | Ligand - A:GLU196                       | Ligand - A:VAL435;<br>Ligand - A:ARG264                                                                   |
| La-L1       | -8.46                   | Ligand - A:PRO261;<br>Ligand - A:PRO263;<br>Ligand - A:ALA451                                             | NA                                      | Ligand - A:PRO263;<br>Ligand - A:ALA451                                                                   |
| La-L2       | -7.37                   | Ligand - A:LEU195;<br>Ligand - A:THR198;<br>Ligand - A:LYS166;<br>Ligand - A:LYS163;<br>Ligand - A:HIS266 | Ligand - A:LYS166;<br>Ligand - A:ASP199 | Ligand - A:TYR453;<br>Ligand - A:ALA451;<br>Ligand - A:PRO263;<br>Ligand - A:LYS163                       |
| La-L3       | -8.60                   | Ligand - A:ASP431;<br>Ligand - A:GLU196                                                                   | Ligand - A:ASP431                       | Ligand - A:GLU196;<br>Ligand - A:PRO263;<br>Ligand - A:ARG264                                             |
| La-L4       | -7.66                   | Ligand - A:GLU196;<br>Ligand - A:PRO263;<br>Ligand - A:GLY162;<br>Ligand - A:SER158                       | NA                                      | NA                                                                                                        |
| Ce-L1       | -7.50                   | Ligand: C -<br>A:ASP199:OD1                                                                               | Ligand - A:LYS166                       | Ligand - A:TYR453;<br>Ligand - A:GLU196;<br>Ligand - A:ALA451;<br>Ligand - A:PRO263;<br>Ligand - A:LYS163 |
| Ce-L2       | -6.98                   | Ligand - A:PRO263;<br>Ligand - A:ASP431;<br>Ligand - A:ARG264;<br>Ligand - A:ALA451                       | Ligand - A:GLU196;<br>Ligand - A:ARG264 | Ligand - A:TYR262;<br>Ligand - A:PRO263;<br>Ligand - A:ALA451                                             |
| Ce-L3       | -6.91                   | Ligand - A:ASP431;<br>Ligand - A:PRO263                                                                   | Ligand - A:ARG264;<br>Ligand - A:ASP431 | Ligand - A:TYR262;<br>Ligand - A:PRO263;<br>Ligand - A:VAL435                                             |
| Ce-L4       | -7.62                   | Ligand - A:PRO261;<br>Ligand - A:PRO263                                                                   | Ligand - A:GLU196                       | Ligand - A:TYR453;<br>Ligand - A:TYR262;<br>Ligand - A:PRO263;<br>Ligand - A:ALA451                       |
| Vinblastina | -8.89                   | Ligand - A:PRO263;<br>Ligand - A:ASP431                                                                   | NA                                      | Ligand - A:GLU196;<br>Ligand - A:VAL435;<br>Ligand - A:TYR262;<br>Ligand - A:PRO263;<br>Ligand - A:ARG264 |

**Table S6.** Interaction of the molecules with *S. aureus* PBP2A

| Molecule | Binding energy kcal/mol | Hydrogen bonds                                                                                                                                                              | Electrostatic bond                                                                                        | Hydrophobic bond                                                                                                                |
|----------|-------------------------|-----------------------------------------------------------------------------------------------------------------------------------------------------------------------------|-----------------------------------------------------------------------------------------------------------|---------------------------------------------------------------------------------------------------------------------------------|
| L1       | -7.59                   | Ligand - A:ASP323;<br>Ligand - B:GLU161;<br>Ligand - B:LYS153                                                                                                               | Ligand - B:LYS153;<br>Ligand - B:ASP323                                                                   | Ligand - A:LYS322;<br>Ligand - A:ASP323;<br>Ligand - B:ASP323;<br>Ligand - A:LYS322;<br>Ligand - B:LEU155;<br>Ligand - A:LEU155 |
| L2       | -7.70                   | Ligand - B:LYS322;<br>Ligand - A:GLU161;<br>Ligand - B:ASP320;<br>Ligand - B:ASP323;<br>Ligand - A:LYS153                                                                   | Ligand - A:ASP323;<br>Ligand - B:ASP323                                                                   | Ligand - B:LEU155;<br>Ligand - A:LEU155;<br>Ligand - B:LYS322                                                                   |
| L3       | -7.03                   | Ligand - A:GLN325;<br>Ligand - B:ASP323                                                                                                                                     | Ligand - A:GLU161                                                                                         | Ligand - B:ASP323;<br>Ligand - B:LYS322;<br>Ligand - A:LEU155;<br>Ligand - B:LEU155                                             |
| L4       | -6.65                   | Ligand - B:ASP323;<br>Ligand - B:GLU161;<br>Ligand - A:GLU161                                                                                                               | Ligand - A:ASP323                                                                                         | Ligand - B:LEU155;<br>Ligand - A:LEU155                                                                                         |
| La-L1    | -10.01                  | Ligand - A:LYS148                                                                                                                                                           | Ligand - A:LYS148;<br>Ligand - A:GLU170;<br>Ligand - A:ASP275                                             | Ligand - A:PRO258;<br>Ligand - A:VAL277;<br>Ligand - A:ARG151;<br>Ligand - A:ARG241;<br>Ligand - A:VAL256                       |
| La-L2    | -8.47                   | Ligand - A:LYS148;<br>Ligand - A:ARG151;<br>Ligand - A:ASP275;<br>Ligand - A:ASP295;<br>Ligand - A:HIS293;<br>Ligand - A:VAL277                                             | Ligand - A:LYS148;<br>Ligand - A:HIS293                                                                   | Ligand - A:HIS293;<br>Ligand - A:PRO258;<br>Ligand - A:VAL277                                                                   |
| La-L3    | -9.52                   | Ligand - A:GLU239;<br>Ligand - A:ASP275;<br>Ligand - A:GLU170                                                                                                               | Ligand - A:LYS148;<br>Ligand - A:ASP275                                                                   | Ligand - A:THR238;<br>Ligand - A:PRO213;<br>Ligand - A:VAL277                                                                   |
| La-L4    | -8.36                   | Ligand - A:GLU239;<br>Ligand - A:PHE211;<br>Ligand - A:THR238G1                                                                                                             | NA                                                                                                        | Ligand - A:PRO213;<br>Ligand - B:ILE309; Ligand<br>- A:VAL277                                                                   |
| Ce-L1    | -9.87                   | Ligand - A:LYS148;<br>Ligand - A:GLU17                                                                                                                                      | Ligand - A:LYS148;<br>Ligand - A:GLU239                                                                   | Ligand - A:VAL256;<br>Ligand - A:VAL277;<br>Ligand - A:MET372                                                                   |
| Ce-L2    | -9.60                   | Ligand - A:GLU239;<br>Ligand - A:THR238;<br>Ligand - A:ASP295;<br>Ligand - A:HIS293                                                                                         | Ligand - A:LYS148;<br>Ligand - A:GLU170;<br>Ligand - A:ASP275                                             | Ligand - A:SER240;<br>Ligand - A:ARG151;<br>Ligand - A:ARG241;<br>Ligand - A:VAL277                                             |
| Ce-L3    | -8.96                   | Ligand - A:HIS293                                                                                                                                                           | Ligand - A:LYS148;<br>Ligand - A:HIS293;<br>Ligand - A:GLU170;<br>Ligand - A:GLU239;<br>Ligand - B:GLU315 | Ligand - A:GLU239;<br>Ligand - A:ARG151;<br>Ligand - A:ARG241;<br>Ligand - A:VAL277;<br>Ligand - A:HIS293;<br>Ligand - A:PRO213 |
| Ce-L4    | -8.48                   | Ligand - A:THR238;<br>Ligand - A:VAL277;<br>Ligand - A:ARG241;<br>Ligand - A:HIS293;<br>Ligand - A:ASN164;<br>Ligand - A:GLN292;<br>Ligand - A:GLU239;<br>Ligand - A:ASP275 | Ligand - A:ASP275                                                                                         | Ligand - A:ARG151;<br>Ligand - A:ARG241;<br>Ligand - A:ALA276;<br>Ligand - A:VAL277                                             |



|                 |       |                                                                                                                                 |                   |                                                                                                                                                       |
|-----------------|-------|---------------------------------------------------------------------------------------------------------------------------------|-------------------|-------------------------------------------------------------------------------------------------------------------------------------------------------|
| Cefepime        | -5.93 | Ligand - A:LYS148;<br>Ligand - A:ARG151;<br>Ligand - A:THR165;<br>Ligand - A:HIS293;<br>Ligand - A:GLU239;<br>Ligand - A:ARG241 | Ligand - A:ARG241 | NA                                                                                                                                                    |
| Ceftobiprole    | -7.06 | Ligand - A:GLU239;<br>Ligand - A:GLU294;<br>Ligand - A:ASP295;<br>Ligand - A:LYS148;<br>Ligand - A:GLN292;<br>Ligand - A:HIS293 | NA                | Ligand - A:GLU239;<br>Ligand - A:LYS273;<br>Ligand - A:ALA276;<br>Ligand - A:VAL277;<br>Ligand - A:ARG151;<br>Ligand - A:ARG241;<br>Ligand - A:HIS293 |
| Benzopenicillin | -6.23 | Ligand - A:ARG241;<br>Ligand - A:HIS293                                                                                         | Ligand - A:HIS293 | Ligand - A:HIS293;<br>Ligand - A:LYS273;<br>Ligand - A:ALA276                                                                                         |

---
